# Supplementary material
Source: HighWire-hosted journal article supplement (https://bmjopen.bmj.com/content/9/11/e032703)
Supplement: inline-supplementary-material-1 [file inline-supplementary-material-1.pdf]

## Supplementary Appendix

### Figure Legends

**Supplementary Figure A:** Calibration slopes and confidence intervals of models in training set (National Health and Nutrition Examination Survey, 1999-2010 linked to the 2011 National Death Index, N= 12600). All models included demographic variables age, sex, and race (Black race, Hispanic ethnicity). ACC=American College of Cardiology covariates of total cholesterol (mg/dL), high-density lipoprotein cholesterol (HDL; mg/dL), systolic blood pressure (mmHg), blood pressure treatment status (yes/no), diabetes status (yes/no), and current smoking status (yes/no), HEI=healthy eating index, AHEI=alternative healthy eating index, MDS=Mediterranean diet score, DASH=dietary approaches to stop hypertension diet score, GBM=gradient boosted machine, RF=random forest

**Supplementary Figure B:** Model discrimination (C-statistic) in training set (National Health and Nutrition Examination Survey, 1999-2010 linked to the 2011 National Death Index, N= 12600). All models included demographic variables age, sex, and race (Black race, Hispanic ethnicity). ACC=American College of Cardiology covariates of total cholesterol (mg/dL), high-density lipoprotein cholesterol (HDL; mg/dL), systolic blood pressure (mmHg), blood pressure treatment status (yes/no), diabetes status (yes/no), and current smoking status (yes/no), HEI=healthy eating index, AHEI=alternative healthy eating index, MDS=Mediterranean diet score, DASH=dietary approaches to stop hypertension diet score, GBM=gradient boosted machine, RF=random forest

**Supplementary Figure C:** Partial dependence plots for best model (100 trees, interaction depth 5 using demographics, ACC variables, and full nutrition profile) for (a) age and (b) systolic blood pressure. Plots estimated by averaging model predictions for by decile of age or SBP.

**Supplementary Table A:** List of all predictor variables included in statistical models

| <b>Variable name</b>                     | <b>Definition</b>                                                                                                       |
|------------------------------------------|-------------------------------------------------------------------------------------------------------------------------|
| <b>Demographic and risk factors (4)</b>  |                                                                                                                         |
| age                                      | Age in years                                                                                                            |
| sex                                      | Sex (0 if male, 1 if female)                                                                                            |
| black                                    | Black race (0 if no, 1 if yes)                                                                                          |
| hispanic                                 | Hispanic ethnicity (0 if no, 1 if yes)                                                                                  |
| <b>ACC covariates (7)</b>                |                                                                                                                         |
| total_chol                               | Total cholesterol (mg/dL)                                                                                               |
| hdl                                      | HDL cholesterol (mg/dL)                                                                                                 |
| sbp                                      | Systolic blood pressure (mmHg)                                                                                          |
| dbp                                      | Diastolic blood pressure (mmHg)                                                                                         |
| bpmeds                                   | Number of blood pressure medications                                                                                    |
| dm                                       | Type 2 diabetes (0 if no, 1 if yes)                                                                                     |
| tob                                      | Current smoking (0 if no, 1 if yes)                                                                                     |
| <b>Composite nutrition variables (4)</b> |                                                                                                                         |
| hei                                      | Healthy eating index (0-100)                                                                                            |
| ahei                                     | Alternative healthy eating index (0-110)                                                                                |
| mds                                      | Mediterranean diet score (0-9)                                                                                          |
| dash                                     | DASH diet score (0-80)                                                                                                  |
| <b>24-hour recall variables (103)</b>    |                                                                                                                         |
| milk_g                                   | Milk and milk drinks (g)                                                                                                |
| cream_g                                  | Creams and cream substitutes (g)                                                                                        |
| milk_dessert_g                           | Milk desserts, sauces, gravies (g)                                                                                      |
| cheese_g                                 | Cheeses (g)                                                                                                             |
| meat_ns_g                                | Meat, not specified as to type (g)                                                                                      |
| beef_g                                   | Beef (g)                                                                                                                |
| pork_g                                   | Pork (g)                                                                                                                |
| lamb_g                                   | Lamb, veal, game, other carcass meat (g)                                                                                |
| poultry_g                                | Poultry (g)                                                                                                             |
| organ_meat_g                             | Organ meats, sausages, and lunchmeats, and meat spreads (g)                                                             |
| fish_g                                   | Fish and shellfish (g)                                                                                                  |
| meat_nonmeat_g                           | Meat, poultry, fish with nonmeat items (g)                                                                              |
| protein_frozen_g                         | Protein and shelf-stable plate meals, soups, and gravies with meat, poultry fish base; gelatin and gelatin-based drinks |
| eggs_g                                   | Eggs (g)                                                                                                                |
| egg_mixture_g                            | Egg mixtures (g)                                                                                                        |
| egg_sub_g                                | Egg substitutes (g)                                                                                                     |
| egg_frozen_g                             | Frozen plate meals with egg as major ingredient (g)                                                                     |
| legumes_g                                | Legumes (g)                                                                                                             |
| nuts_g                                   | Nuts, nut butters, and nut mixtures (g)                                                                                 |
| seeds_g                                  | Seeds and seed mixtures (g)                                                                                             |
| carob_g                                  | Carob products (g)                                                                                                      |
| flour_mix_g                              | Flour and dry mixes (g)                                                                                                 |
| bread_yeast_g                            | Yeast breads, rolls (g)                                                                                                 |
| bread_quick_g                            | Quick breads (g)                                                                                                        |
| pastries_g                               | Cakes, cookies, pies, pastries, bars (g)                                                                                |

|                  |                                                                                        |
|------------------|----------------------------------------------------------------------------------------|
| crackers_g       | Crackers and salty snacks from grain products (g)                                      |
| pancakes_g       | Pancakes, waffles, French toast, other grain products (g)                              |
| pastas_g         | Pastas, cooked cereals, rice (g)                                                       |
| cereals_g        | Cereals, not cooked or not specified as to cooked (g)                                  |
| grain_mix_g      | Grain mixtures, frozen plate meals, soups (g)                                          |
| meat_sub_g       | Meat substitutes, mainly cereal protein (g)                                            |
| citrus_g         | Citrus fruits, juices (g)                                                              |
| fruit_dried_g    | Dried fruits (g)                                                                       |
| fruit_other_g    | Other fruits (g)                                                                       |
| fruit_juice_g    | Fruit juices and nectars excluding citrus (g)                                          |
| fruit_baby_g     | Fruit and juices baby food (g)                                                         |
| potatoes_g       | White potatoes and Puerto Rican starchy vegetables (g)                                 |
| veg_darkgreen_g  | Dark-green vegetables (g)                                                              |
| veg_deepyellow_g | Deep-yellow vegetables (g)                                                             |
| tomatoes_g       | Tomatoes and tomato mixtures (g)                                                       |
| veg_other_g      | Other vegetables (g)                                                                   |
| veg_baby_g       | Vegetables and mixtures mostly vegetables baby food (g)                                |
| veg_meat_g       | Vegetables with meat, poultry, fish (g)                                                |
| veg_mixture_g    | Mixtures mostly vegetables without meat, poultry, fish (g)                             |
| fats_g           | Fats (g)                                                                               |
| oils_g           | Oils (g)                                                                               |
| salad_dressing_g | Salad dressings (g)                                                                    |
| sweets_g         | Sugars and sweets (g)                                                                  |
| bev_nonalcohol_g | Nonalcoholic beverages (g)                                                             |
| bev_alcohol_g    | Alcoholic beverages (g)                                                                |
| water_g          | Water, noncarbonated (g)                                                               |
| bev_nutrition_g  | Formulated nutrition beverages, energy drinks, sports drinks, functional beverages (g) |
| kcal             | Energy (kcal)                                                                          |
| protein_g        | Protein (g)                                                                            |
| carb_g           | Carbohydrates (g)                                                                      |
| fiber_g          | Fiber (g)                                                                              |
| fat_g            | Fat (g)                                                                                |
| fat_sat_g        | Saturated fats (g)                                                                     |
| fat_mono_g       | Monounsaturated fats (g)                                                               |
| fat_poly_g       | Polyunsaturated fats (g)                                                               |
| cholesterol_mg   | Cholesterol (mg)                                                                       |
| vite_mg          | Vitamin-E as alpha-tocopherol (mg)                                                     |
| vita_mcg         | Vitamin A, RAE (mcg)                                                                   |
| betacar_mcg      | Beta-carotene (mcg)                                                                    |
| vitb1_mg         | Thiamin (Vitamin B1) (mg)                                                              |
| vitb2_mg         | Riboflavin (Vitamin B2) (mg)                                                           |

|                    |                                       |
|--------------------|---------------------------------------|
| niacin_mg          | Niacin (mg)                           |
| vitb6_mg           | Vitamin B6 (mg)                       |
| folate_mcg         | Total folate (mcg)                    |
| vitb12_mcg         | Vitamin B12 (mcg)                     |
| vitc_mg            | Vitamin C (mg)                        |
| calcium_mg         | Calcium (mg)                          |
| phosphorus_mg      | Phosphorus (mg)                       |
| magnesium_mg       | Magnesium (mg)                        |
| iron_mg            | Iron (mg)                             |
| zinc_mg            | Zinc (mg)                             |
| copper_mg          | Copper (mg)                           |
| sodium_mg          | Sodium (mg)                           |
| potassium_mg       | Potassium (mg)                        |
| selenium_mcg       | Selenium (mg)                         |
| caffeine_mg        | Caffeine (mg)                         |
| theobromine_mg     | Theobromine (mg)                      |
| alcohol_gm         | Alcohol (gm)                          |
| sfa_40_gm          | SFA 4:0 (Butanoic) (g)                |
| sfa_60_gm          | SFA 6:0 (Hexanoic) (g)                |
| sfa_80_gm          | SFA 8:0 (Octanoic) (g)                |
| sfa_100_gm         | SFA 10:0 (Decanoic) (g)               |
| sfa_120_gm         | SFA 12:0 (Dodecanoic) (g)             |
| sfa_140_gm         | SFA 14:0 (Tetradecanoic) (g)          |
| sfa_160_gm         | SFA 16:0 (Hexadecanoic) (g)           |
| sfa_180_gm         | SFA 18:0 (Octadecanoic) (g)           |
| mfa_161h_gm        | MFA 16:1 (Hexadecanoic) (g)           |
| mfa_161o_gm        | MFA 16:1 (Octadecanoic) (g)           |
| mfa_201_gm         | MFA 20:1 (Eicosenoic) (g)             |
| mfa_221_gm         | MFA 22:1 (Docosenoic) (g)             |
| pfa_182_gm         | PFA 18:2 (Octadecadienoic) (g)        |
| pfa_183_gm         | PFA 18:3 (Octadecatrienoic) (g)       |
| pfa_184_gm         | PFA 18:4 (Octadecatetraenoic) (g)     |
| pfa_204_gm         | PFA 20:4 (Eicosatetraenoic) (g)       |
| pfa_205_gm         | PFA 20:5 (Eicosapentaenoic) (g)       |
| pfa_225_gm         | PFA 22:5 (Docosapentaenoic) (g)       |
| pfa_226_gm         | PFA 22:6 (Docosahexaenoic) (g)        |
| water_yesterday_gm | Total plain water drank yesterday (g) |

**Supplementary Table B:** Percentage of missing data for variables included in analysis

| <b>Variable</b>  | <b>Percentage missing</b> |
|------------------|---------------------------|
| milk_g           | 10.99                     |
| cream_g          | 10.99                     |
| milk_dessert_g   | 10.99                     |
| cheese_g         | 10.99                     |
| meat_ns_g        | 10.99                     |
| beef_g           | 10.99                     |
| pork_g           | 10.99                     |
| lamb_g           | 10.99                     |
| poultry_g        | 10.99                     |
| organ_meat_g     | 10.99                     |
| fish_g           | 10.99                     |
| meat_nonmeat_g   | 10.99                     |
| protein_frozen_g | 10.99                     |
| eggs_g           | 10.99                     |
| egg_mixture_g    | 10.99                     |
| egg_sub_g        | 10.99                     |
| egg_frozen_g     | 10.99                     |
| legumes_g        | 10.99                     |
| nuts_g           | 10.99                     |
| seeds_g          | 10.99                     |
| carob_g          | 10.99                     |
| flour_mix_g      | 10.99                     |
| bread_yeast_g    | 10.99                     |
| bread_quick_g    | 10.99                     |
| pastries_g       | 10.99                     |
| crackers_g       | 10.99                     |
| pancakes_g       | 10.99                     |
| pastas_g         | 10.99                     |
| cereals_g        | 10.99                     |
| grain_mix_g      | 10.99                     |
| meat_sub_g       | 10.99                     |
| citrus_g         | 10.99                     |
| fruit_dried_g    | 10.99                     |
| fruit_other_g    | 10.99                     |
| fruit_juice_g    | 10.99                     |
| fruit_baby_g     | 10.99                     |
| potatoes_g       | 10.99                     |
| veg_darkgreen_g  | 10.99                     |
| veg_deepyellow_g | 10.99                     |
| tomatoes_g       | 10.99                     |
| veg_other_g      | 10.99                     |
| veg_baby_g       | 10.99                     |
| veg_meat_g       | 10.99                     |
| veg_mixture_g    | 10.99                     |

| <b>Variable</b>  | <b>Percentage missing</b> |
|------------------|---------------------------|
| fats_g           | 10.99                     |
| oils_g           | 10.99                     |
| salad_dressing_g | 10.99                     |
| sweets_g         | 10.99                     |
| bev_nonalcohol_g | 10.99                     |
| bev_alcohol_g    | 10.99                     |
| water_g          | 10.99                     |
| bev_nutrition_g  | 10.99                     |
| permth_int       | 0.00                      |
| bpmeds           | 0.00                      |
| kcal             | 10.98                     |
| protein_g        | 10.98                     |
| carb_g           | 10.98                     |
| fiber_g          | 10.98                     |
| fat_g            | 10.98                     |
| fat_sat_g        | 10.98                     |
| fat_mono_g       | 10.98                     |
| fat_poly_g       | 10.98                     |
| cholesterol_mg   | 10.98                     |
| vite_mg          | 10.98                     |
| vita_mg          | 10.98                     |
| betacarot_mcg    | 10.98                     |
| vitb1_mg         | 10.98                     |
| vitb2_mg         | 10.98                     |
| niacin_mg        | 10.98                     |
| vitb6_mg         | 10.98                     |
| folate_mcg       | 10.98                     |
| vitb12_mcg       | 10.98                     |
| vitc_mg          | 10.98                     |
| calcium_mg       | 10.98                     |
| phosphorus_mg    | 10.98                     |
| magnesium_mg     | 10.98                     |
| iron_mg          | 10.98                     |
| zinc_mg          | 10.98                     |
| copper_mg        | 10.98                     |
| sodium_mg        | 10.98                     |
| potassium_mg     | 10.98                     |
| selenium_mcg     | 10.98                     |
| caffeine_mg      | 10.98                     |
| theobromine_mg   | 10.98                     |
| alcohol_gm       | 10.98                     |
| sfa_40_gm        | 10.98                     |
| sfa_60_gm        | 10.98                     |
| sfa_80_gm        | 10.98                     |
| sfa_100_gm       | 10.98                     |

---

| <b>Variable</b>    | <b>Percentage missing</b> |
|--------------------|---------------------------|
| sfa_120_gm         | 10.98                     |
| sfa_140_gm         | 10.98                     |
| sfa_160_gm         | 10.98                     |
| sfa_180_gm         | 10.98                     |
| mfa_161h_gm        | 10.98                     |
| mfa_161o_gm        | 10.98                     |
| mfa_201_gm         | 10.98                     |
| mfa_221_gm         | 10.98                     |
| pfa_182_gm         | 10.98                     |
| pfa_183_gm         | 10.98                     |
| pfa_184_gm         | 10.98                     |
| pfa_204_gm         | 10.98                     |
| pfa_205_gm         | 10.98                     |
| pfa_225_gm         | 10.98                     |
| pfa_226_gm         | 10.98                     |
| water_yesterday_gm | 10.82                     |
| age                | 0.00                      |
| sex                | 0.00                      |
| black              | 29.66                     |
| hispanic           | 0.00                      |
| sbp                | 10.77                     |
| tob                | 0.00                      |
| hdl                | 12.21                     |
| total_chol         | 12.21                     |
| pov                | 8.96                      |
| dm                 | 47.92                     |
| cvdevent           | 0.00                      |
| hd                 | 0.00                      |
| cereb              | 0.00                      |
| educ2              | 7.35                      |
| hei                | 11.05                     |
| ahei               | 10.99                     |
| mds                | 11.05                     |
| dash               | 29.76                     |

---

Supplementary Table C: TRIPOD checklist

| Title and abstract         |     |                                                                                                                                                                                                       | Page number                            |
|----------------------------|-----|-------------------------------------------------------------------------------------------------------------------------------------------------------------------------------------------------------|----------------------------------------|
| Title                      | 1   | Identify the study as developing and/or validating a multivariable prediction model, the target population, and the outcome to be predicted                                                           | 1                                      |
| Abstract                   | 2   | Provide a summary of objectives, study design, setting, participants, sample size, predictors, outcome, statistical analysis, results, and conclusions                                                | 2                                      |
| <b>Introduction</b>        |     |                                                                                                                                                                                                       |                                        |
| Background and objectives  | 3a  | Explain the medical context (including diagnostic or prognostic) and rationale for developing or validating the multivariable prediction model, including references to existing models               | 4-5                                    |
|                            | 3b  | Specify the objectives, including whether the study describes the development or validation of the model, or both                                                                                     | 4-5                                    |
| <b>Methods</b>             |     |                                                                                                                                                                                                       |                                        |
| Source of data             | 4a  | Describe the study design or sources of data (e.g., randomized trial, cohort, or registry data), separately for the development and validation data sets, if applicable                               | 5                                      |
|                            | 4b  | Specify the key study dates, including start of accrual; end of accrual; and, if applicable, end of follow-up                                                                                         | 5                                      |
| Participants               | 5a  | Specify key elements of the study setting (e.g., primary care, secondary care, general population) including number and location of centers                                                           | 5                                      |
|                            | 5b  | Describe eligibility criteria for participants                                                                                                                                                        | 6                                      |
|                            | 5c  | Give details of treatments received, if relevant                                                                                                                                                      | N/A                                    |
| Outcome                    | 6a  | Clearly define the outcome that is predicted by the prediction model, including how and when assessed                                                                                                 | 6                                      |
|                            | 6b  | Report any actions to blind assessment of the outcome to be predicted                                                                                                                                 | 6                                      |
| Predictors                 | 7a  | Clearly define all predictors used in developing the multivariable prediction model, including how and when they were measured                                                                        | 6, Supp Table A                        |
|                            | 7b  | Report any actions to blind assessment of predictors for the outcome and other predictors                                                                                                             | 6                                      |
| Sample size                | 8   | Explain how the study size was arrived at                                                                                                                                                             | 7                                      |
| Missing data               | 9   | Describe how missing data were handled (e.g., complete-case analysis, single imputation, multiple imputation) with details of any imputation method                                                   | 7                                      |
| Statistical analysis       | 10a | Describe how predictors were handled in the analysis (D)                                                                                                                                              | 6-7                                    |
|                            | 10b | Specify type of model, all model-building procedures (including any predictor selection), and method for internal validation (D)                                                                      | 7-8                                    |
|                            | 10c | For validation, describe how predictions were calculated (V)                                                                                                                                          | 9                                      |
|                            | 10d | Specify all measures used to assess model performance and, if relevant, to compare multiple models                                                                                                    | 8-9                                    |
|                            | 10e | Describe any model updating (e.g., recalibration) arising from the validation, if done (V)                                                                                                            | 9                                      |
| Risk groups                | 11  | Provide details on how risk groups were created, if done                                                                                                                                              | N/A                                    |
| Development vs. validation | 12  | For validation, identify any differences from the development data in setting, eligibility criteria, outcome, and predictors (V)                                                                      | N/A                                    |
| <b>Results</b>             |     |                                                                                                                                                                                                       |                                        |
| Participants               | 13a | Describe the flow of participants through the study, including the number of participants with and without the outcome and, if applicable, a summary of the follow-up time. A diagram may be helpful. | 10                                     |
|                            | 13b | Describe the characteristics of the participants (basic demographics, clinical features, available predictors), including number of participants with missing data for predictors and outcome         | 10, Table 1                            |
|                            | 13c | For validation, show a comparison with the development data of the distribution of important variables (demographics, predictors, and outcome) (V)                                                    | 10, Table 1                            |
| Model development          | 14a | Specify the number of participants and outcome events in each analysis (D)                                                                                                                            | 10-11                                  |
|                            | 14b | If done, report the unadjusted association between each candidate predictor and outcome (D)                                                                                                           | 12-13, Supp Table P                    |
| Model specification        | 15a | Present the full prediction model to allow predictions for individuals (i.e., all regression coefficients, and model intercept or baseline survival at a given time point) (D)                        | 12-13, Supp Table P, GitHub repository |
|                            | 15b | Explain how to use the prediction model (D)                                                                                                                                                           | 12-13                                  |
| Model performance          | 16  | Report performance measures (with CIs) for the prediction model                                                                                                                                       | 11-13                                  |
| Model updating             | 17  | If done, report the results from any model updating (i.e., model specification, model performance) (V)                                                                                                | N/A                                    |
| <b>Discussion</b>          |     |                                                                                                                                                                                                       |                                        |
| Limitations                | 18  | Discuss any limitations of the study (such as non-representative sample, few events per predictor, missing data)                                                                                      | 15                                     |
| Interpretation             | 19a | For validation, discuss the results with reference to performance in the development data, and any other validation data (V)                                                                          | 14-15                                  |
|                            | 19b | Give an overall interpretation of the results, considering objectives, limitations, results from similar studies, and other relevant evidence                                                         | 15-16                                  |
| Implications               | 20  | Discuss the potential clinical use of the model and implications for future research                                                                                                                  | 15-16                                  |
| Other information          |     |                                                                                                                                                                                                       |                                        |
| Supplementary information  | 21  | Provide information about the availability of supplementary resources, such as study protocol, Web calculator, and data sets                                                                          | 10                                     |
| Funding                    | 22  | Give the source of funding and the role of the funders for the present study                                                                                                                          | 16                                     |



**Supplementary Table D:** Internal validation results from models including demographic and ACC variables only. Criteria is equal to  $(\text{slope}-1)^2 + (\text{C-statistic}-1)^2$ .

|                     | <b>Intercept</b>              | <b>Slope</b>               | <b>C-Statistic</b>         | <b>Criteria</b> |
|---------------------|-------------------------------|----------------------------|----------------------------|-----------------|
|                     | <b>95% CI</b>                 | <b>95% CI</b>              | <b>95% CI</b>              |                 |
| <b>Cox</b>          | 0.0011<br>-0.0016<br>0.0038   | 0.5144<br>0.4941<br>0.5348 | 0.8607<br>0.8517<br>0.8698 | 0.2552          |
| <b>GBM: 100, 1</b>  | -0.0004<br>-0.0070<br>0.0061  | 0.5415<br>0.4919<br>0.5910 | 0.8761<br>0.8680<br>0.8842 | 0.2256          |
| <b>GBM: 100, 5</b>  | -0.0022<br>-0.0044<br>0.0000  | 0.5550<br>0.5399<br>0.5702 | 0.8990<br>0.8912<br>0.9068 | 0.2082          |
| <b>GBM: 100, 10</b> | -0.0039<br>-0.0106<br>0.0029  | 0.5678<br>0.5237<br>0.6118 | 0.9163<br>0.9088<br>0.9238 | 0.1938          |
| <b>GBM: 300, 1</b>  | 0.0005<br>-0.0070<br>0.0079   | 0.5388<br>0.4847<br>0.5930 | 0.8747<br>0.8664<br>0.8831 | 0.2284          |
| <b>GBM: 300, 5</b>  | -0.0014<br>-0.0050<br>0.0023  | 0.5436<br>0.5186<br>0.5687 | 0.8963<br>0.8884<br>0.9042 | 0.2191          |
| <b>GBM: 300, 10</b> | -0.0038<br>-0.0068<br>-0.0007 | 0.5719<br>0.5514<br>0.5924 | 0.9140<br>0.9065<br>0.9215 | 0.1907          |
| <b>GBM: 500, 1</b>  | -0.0004<br>-0.0070<br>0.0062  | 0.5401<br>0.4908<br>0.5894 | 0.8767<br>0.8685<br>0.8849 | 0.2267          |
| <b>GBM: 500, 5</b>  | -0.0014<br>-0.0042<br>0.0015  | 0.5493<br>0.5295<br>0.5691 | 0.8985<br>0.8907<br>0.9063 | 0.2134          |
| <b>GBM: 500, 10</b> | -0.0020<br>-0.0052<br>0.0012  | 0.5488<br>0.5279<br>0.5696 | 0.9113<br>0.9037<br>0.9189 | 0.2114          |
| <b>RF: 100, 1</b>   | -0.0462<br>-0.0824<br>-0.0101 | 1.3190<br>0.8935<br>1.7445 | 0.9210<br>0.9140<br>0.9279 | 0.1080          |
| <b>RF: 100, 5</b>   | -0.0185<br>-0.0489<br>0.0118  | 0.7434<br>0.5668<br>0.9199 | 0.9728<br>0.9705<br>0.9751 | 0.0666          |
| <b>RF: 100, 10</b>  | -0.0191<br>-0.0526<br>0.0144  | 0.7191<br>0.5421<br>0.8961 | 0.9720<br>0.9696<br>0.9744 | 0.0797          |
| <b>RF: 300, 1</b>   | -0.0442<br>-0.0750<br>-0.0135 | 1.2884<br>0.9315<br>1.6454 | 0.9210<br>0.9140<br>0.9279 | 0.0894          |

|                    |         |        |        |        |
|--------------------|---------|--------|--------|--------|
| <b>RF: 300, 5</b>  | -0.0156 | 0.7380 | 0.9731 | 0.0694 |
|                    | -0.0409 | 0.5808 | 0.9708 |        |
|                    | 0.0096  | 0.8951 | 0.9755 |        |
| <b>RF: 300, 10</b> | -0.0194 | 0.7222 | 0.9724 | 0.0779 |
|                    | -0.0535 | 0.5423 | 0.9701 |        |
|                    | 0.0147  | 0.9021 | 0.9747 |        |
| <b>RF: 500, 1</b>  | -0.0475 | 1.3431 | 0.9272 | 0.1230 |
|                    | -0.0805 | 0.9557 | 0.9206 |        |
|                    | -0.0145 | 1.7304 | 0.9337 |        |
| <b>RF: 500, 5</b>  | -0.0198 | 0.7633 | 0.9763 | 0.0566 |
|                    | -0.0524 | 0.5706 | 0.9741 |        |
|                    | 0.0128  | 0.9560 | 0.9784 |        |
| <b>RF: 500, 10</b> | -0.0219 | 0.7462 | 0.9758 | 0.0650 |
|                    | -0.0610 | 0.5376 | 0.9736 |        |
|                    | 0.0172  | 0.9549 | 0.9780 |        |

**Supplementary Table E:** *Internal* validation results from models including demographic, ACC variables, and HEI. Criteria is equal to  $(\text{slope}-1)^2 + (\text{C-statistic}-1)^2$ .

|                     | <b>Intercept</b> | <b>Slope</b>  | <b>C-Statistic</b> | <b>Criteria</b> |
|---------------------|------------------|---------------|--------------------|-----------------|
|                     | <b>95% CI</b>    | <b>95% CI</b> | <b>95% CI</b>      |                 |
| <b>Cox</b>          | 0.0009           | 0.5165        | 0.8608             | 0.2531          |
|                     | -0.0018          | 0.4962        | 0.8517             |                 |
|                     | 0.0036           | 0.5368        | 0.8699             |                 |
| <b>GBM: 100, 1</b>  | -0.0006          | 0.5595        | 0.8762             | 0.2094          |
|                     | -0.0065          | 0.5159        | 0.8679             |                 |
|                     | 0.0054           | 0.6031        | 0.8845             |                 |
| <b>GBM: 100, 5</b>  | -0.0018          | 0.5513        | 0.8992             | 0.2115          |
|                     | -0.0041          | 0.5348        | 0.8914             |                 |
|                     | 0.0006           | 0.5678        | 0.9070             |                 |
| <b>GBM: 100, 10</b> | -0.0043          | 0.5829        | 0.9107             | 0.1819          |
|                     | -0.0113          | 0.5354        | 0.9027             |                 |
|                     | 0.0028           | 0.6305        | 0.9187             |                 |
| <b>GBM: 300, 1</b>  | -0.0015          | 0.5601        | 0.8752             | 0.2091          |
|                     | -0.0068          | 0.5200        | 0.8668             |                 |
|                     | 0.0037           | 0.6003        | 0.8837             |                 |
| <b>GBM: 300, 5</b>  | -0.0032          | 0.5638        | 0.9027             | 0.1997          |
|                     | -0.0071          | 0.5366        | 0.8950             |                 |
|                     | 0.0008           | 0.5910        | 0.9105             |                 |
| <b>GBM: 300, 10</b> | -0.0049          | 0.5859        | 0.9191             | 0.1780          |
|                     | -0.0106          | 0.5482        | 0.9118             |                 |
|                     | 0.0008           | 0.6236        | 0.9264             |                 |

|                     |         |        |        |        |
|---------------------|---------|--------|--------|--------|
| <b>GBM: 500, 1</b>  | -0.0007 | 0.5485 | 0.8754 | 0.2194 |
|                     | -0.0076 | 0.4959 | 0.8671 |        |
|                     | 0.0062  | 0.6011 | 0.8836 |        |
| <b>GBM: 500, 5</b>  | -0.0030 | 0.5680 | 0.9009 | 0.1964 |
|                     | -0.0063 | 0.5456 | 0.8931 |        |
|                     | 0.0002  | 0.5904 | 0.9088 |        |
| <b>GBM: 500, 10</b> | -0.0035 | 0.5777 | 0.9144 | 0.1857 |
|                     | -0.0086 | 0.5437 | 0.9068 |        |
|                     | 0.0016  | 0.6117 | 0.9219 |        |
| <b>RF: 100, 1</b>   | -0.0463 | 1.3193 | 0.9302 | 0.1068 |
|                     | -0.0772 | 0.9646 | 0.9239 |        |
|                     | -0.0154 | 1.6740 | 0.9365 |        |
| <b>RF: 100, 5</b>   | -0.0193 | 0.7561 | 0.9759 | 0.0601 |
|                     | -0.0512 | 0.5684 | 0.9737 |        |
|                     | 0.0125  | 0.9439 | 0.9782 |        |
| <b>RF: 100, 10</b>  | -0.0207 | 0.7366 | 0.9757 | 0.0700 |
|                     | -0.0575 | 0.5408 | 0.9735 |        |
|                     | 0.0160  | 0.9325 | 0.9779 |        |
| <b>RF: 300, 1</b>   | -0.0448 | 1.2936 | 0.9345 | 0.0905 |
|                     | -0.0793 | 0.9023 | 0.9285 |        |
|                     | -0.0102 | 1.6848 | 0.9405 |        |
| <b>RF: 300, 5</b>   | -0.0199 | 0.7645 | 0.9764 | 0.0560 |
|                     | -0.0523 | 0.5724 | 0.9742 |        |
|                     | 0.0125  | 0.9566 | 0.9785 |        |
| <b>RF: 300, 10</b>  | -0.0213 | 0.7440 | 0.9762 | 0.0661 |
|                     | -0.0591 | 0.5423 | 0.9740 |        |
|                     | 0.0164  | 0.9457 | 0.9783 |        |
| <b>RF: 500, 1</b>   | -0.0454 | 1.3038 | 0.9336 | 0.0967 |
|                     | -0.0815 | 0.8937 | 0.9275 |        |
|                     | -0.0094 | 1.7139 | 0.9397 |        |
| <b>RF: 500, 5</b>   | -0.0174 | 0.7627 | 0.9768 | 0.0568 |
|                     | -0.0459 | 0.5824 | 0.9746 |        |
|                     | 0.0112  | 0.9429 | 0.9789 |        |
| <b>RF: 500, 10</b>  | -0.0182 | 0.7384 | 0.9766 | 0.0690 |
|                     | -0.0500 | 0.5556 | 0.9744 |        |
|                     | 0.0137  | 0.9212 | 0.9787 |        |

**Supplementary Table F:** *Internal* validation results from models including demographic, ACC variables, and AHEI. Criteria is equal to  $(\text{slope}-1)^2 + (\text{C-statistic}-1)^2$ .

|  | <b>Intercept<br/>95% CI</b> | <b>Slope<br/>95% CI</b> | <b>C-Statistic<br/>95% CI</b> | <b>Criteria</b> |
|--|-----------------------------|-------------------------|-------------------------------|-----------------|
|--|-----------------------------|-------------------------|-------------------------------|-----------------|

|                     |         |        |        |        |
|---------------------|---------|--------|--------|--------|
| <b>Cox</b>          | 0.0011  | 0.5142 | 0.8610 | 0.2553 |
|                     | -0.0009 | 0.4993 | 0.8520 |        |
|                     | 0.0031  | 0.5292 | 0.8701 |        |
| <b>GBM: 100, 1</b>  | -0.0012 | 0.5533 | 0.8761 | 0.2149 |
|                     | -0.0075 | 0.5057 | 0.8678 |        |
|                     | 0.0050  | 0.6008 | 0.8844 |        |
| <b>GBM: 100, 5</b>  | -0.0020 | 0.5502 | 0.8991 | 0.2125 |
|                     | -0.0060 | 0.5231 | 0.8912 |        |
|                     | 0.0019  | 0.5773 | 0.9071 |        |
| <b>GBM: 100, 10</b> | -0.0049 | 0.5887 | 0.9147 | 0.1764 |
|                     | -0.0116 | 0.5440 | 0.9070 |        |
|                     | 0.0017  | 0.6334 | 0.9225 |        |
| <b>GBM: 300, 1</b>  | -0.0004 | 0.5399 | 0.8760 | 0.2271 |
|                     | -0.0059 | 0.4989 | 0.8677 | 0.2271 |
|                     | 0.0051  | 0.5808 | 0.8842 | 0.2271 |
| <b>GBM: 300, 5</b>  | -0.0024 | 0.5586 | 0.8977 | 0.2053 |
|                     | -0.0050 | 0.5407 | 0.8897 |        |
|                     | 0.0001  | 0.5764 | 0.9057 |        |
| <b>GBM: 300, 10</b> | -0.0020 | 0.5685 | 0.9159 | 0.1933 |
|                     | -0.0066 | 0.5385 | 0.9081 |        |
|                     | 0.0026  | 0.5985 | 0.9237 |        |
| <b>GBM: 500, 1</b>  | -0.0005 | 0.5416 | 0.8762 | 0.2255 |
|                     | -0.0072 | 0.4909 | 0.8679 |        |
|                     | 0.0063  | 0.5922 | 0.8844 |        |
| <b>GBM: 500, 5</b>  | -0.0021 | 0.5564 | 0.8993 | 0.2069 |
|                     | -0.0055 | 0.5328 | 0.8916 |        |
|                     | 0.0013  | 0.5800 | 0.9071 |        |
| <b>GBM: 500, 10</b> | -0.0037 | 0.5697 | 0.9165 | 0.1921 |
|                     | -0.0110 | 0.5227 | 0.9089 |        |
|                     | 0.0035  | 0.6167 | 0.9242 |        |
| <b>RF: 100, 1</b>   | -0.0481 | 1.3493 | 0.9317 | 0.1267 |
|                     | -0.0844 | 0.9270 | 0.9255 |        |
|                     | -0.0118 | 1.7717 | 0.9379 |        |
| <b>RF: 100, 5</b>   | -0.0202 | 0.7717 | 0.9770 | 0.0526 |
|                     | -0.0539 | 0.5712 | 0.9749 |        |
|                     | 0.0135  | 0.9722 | 0.9791 |        |
| <b>RF: 100, 10</b>  | -0.0214 | 0.7427 | 0.9760 | 0.0668 |
|                     | -0.0596 | 0.5396 | 0.9739 |        |
|                     | 0.0168  | 0.9458 | 0.9782 |        |
| <b>RF: 300, 1</b>   | -0.0438 | 1.2788 | 0.9327 | 0.0823 |
|                     | -0.0756 | 0.9201 | 0.9267 |        |
|                     | -0.0120 | 1.6374 | 0.9387 |        |
| <b>RF: 300, 5</b>   | -0.0171 | 0.7559 | 0.9766 | 0.0601 |
|                     | -0.0450 | 0.5808 | 0.9745 |        |
|                     | 0.0109  | 0.9311 | 0.9788 |        |

|                    |         |        |        |        |
|--------------------|---------|--------|--------|--------|
| <b>RF: 300, 10</b> | -0.0220 | 0.7478 | 0.9766 | 0.0642 |
|                    | -0.0613 | 0.5385 | 0.9745 |        |
|                    | 0.0173  | 0.9571 | 0.9787 |        |
| <b>RF: 500, 1</b>  | -0.0498 | 1.3774 | 0.9330 | 0.1469 |
|                    | -0.0862 | 0.9518 | 0.9269 |        |
|                    | -0.0135 | 1.8029 | 0.9391 |        |
| <b>RF: 500, 5</b>  | -0.0176 | 0.7642 | 0.9772 | 0.0561 |
|                    | -0.0467 | 0.5813 | 0.9750 |        |
|                    | 0.0115  | 0.9471 | 0.9793 |        |
| <b>RF: 500, 10</b> | -0.0183 | 0.7369 | 0.9768 | 0.0698 |
|                    | -0.0505 | 0.5538 | 0.9747 |        |
|                    | 0.0138  | 0.9200 | 0.9789 |        |

**Supplementary Table G:** Internal validation results from models including demographic, ACC variables, and MDS. Criteria is equal to  $(\text{slope}-1)^2 + (\text{C-statistic}-1)^2$ .

|                     | <b>Intercept</b> | <b>Slope</b>  | <b>C-Statistic</b> | <b>Criteria</b> |
|---------------------|------------------|---------------|--------------------|-----------------|
|                     | <b>95% CI</b>    | <b>95% CI</b> | <b>95% CI</b>      |                 |
| <b>Cox</b>          | 0.0009           | 0.5172        | 0.8609             | 0.2524          |
|                     | -0.0015          | 0.4991        | 0.8518             |                 |
|                     | 0.0033           | 0.5352        | 0.8700             |                 |
| <b>GBM: 100, 1</b>  | -0.0017          | 0.5647        | 0.8763             | 0.2048          |
|                     | -0.0064          | 0.5281        | 0.8680             |                 |
|                     | 0.0031           | 0.6012        | 0.8847             |                 |
| <b>GBM: 100, 5</b>  | -0.0010          | 0.5495        | 0.8973             | 0.2135          |
|                     | -0.0041          | 0.5284        | 0.8891             |                 |
|                     | 0.0020           | 0.5705        | 0.9055             |                 |
| <b>GBM: 100, 10</b> | -0.0043          | 0.5771        | 0.9166             | 0.1858          |
|                     | -0.0079          | 0.5530        | 0.9091             |                 |
|                     | -0.0007          | 0.6011        | 0.9241             |                 |
| <b>GBM: 300, 1</b>  | -0.0006          | 0.5417        | 0.8760             | 0.2254          |
|                     | -0.0075          | 0.4895        | 0.8677             |                 |
|                     | 0.0063           | 0.5939        | 0.8843             |                 |
| <b>GBM: 300, 5</b>  | -0.0020          | 0.5547        | 0.8997             | 0.2084          |
|                     | -0.0046          | 0.5367        | 0.8920             |                 |
|                     | 0.0005           | 0.5727        | 0.9073             |                 |
| <b>GBM: 300, 10</b> | -0.0037          | 0.5752        | 0.9151             | 0.1877          |
|                     | -0.0091          | 0.5395        | 0.9075             |                 |
|                     | 0.0017           | 0.6109        | 0.9227             |                 |
| <b>GBM: 500, 1</b>  | -0.0011          | 0.5551        | 0.8769             | 0.2131          |
|                     | -0.0074          | 0.5072        | 0.8687             |                 |
|                     | 0.0051           | 0.6029        | 0.8851             |                 |
| <b>GBM: 500, 5</b>  | -0.0019          | 0.5575        | 0.8984             | 0.2061          |
|                     | -0.0056          | 0.5317        | 0.8905             |                 |

|                     |         |        |        |        |
|---------------------|---------|--------|--------|--------|
|                     | 0.0018  | 0.5832 | 0.9063 |        |
| <b>GBM: 500, 10</b> | -0.0047 | 0.5814 | 0.9167 | 0.1822 |
|                     | -0.0115 | 0.5366 | 0.9092 |        |
|                     | 0.0021  | 0.6263 | 0.9242 |        |
| <b>RF: 100, 1</b>   | -0.0405 | 1.2255 | 0.9238 | 0.0567 |
|                     | -0.0689 | 0.9059 | 0.9175 |        |
|                     | -0.0121 | 1.5451 | 0.9302 |        |
| <b>RF: 100, 5</b>   | -0.0228 | 0.7646 | 0.9724 | 0.0562 |
|                     | -0.0598 | 0.5597 | 0.9701 |        |
|                     | 0.0142  | 0.9695 | 0.9748 |        |
| <b>RF: 100, 10</b>  | -0.0207 | 0.7390 | 0.9731 | 0.0688 |
|                     | -0.0569 | 0.5445 | 0.9707 |        |
|                     | 0.0155  | 0.9336 | 0.9754 |        |
| <b>RF: 300, 1</b>   | -0.0460 | 1.318  | 0.9262 | 0.1066 |
|                     | -0.0788 | 0.935  | 0.9197 |        |
|                     | -0.0132 | 1.701  | 0.9326 |        |
| <b>RF: 300, 5</b>   | -0.0169 | 0.7560 | 0.9733 | 0.0602 |
|                     | -0.0442 | 0.5829 | 0.9709 |        |
|                     | 0.0105  | 0.9291 | 0.9756 |        |
| <b>RF: 300, 10</b>  | -0.0209 | 0.7435 | 0.9734 | 0.0665 |
|                     | -0.0568 | 0.5489 | 0.9711 |        |
|                     | 0.0151  | 0.9380 | 0.9757 |        |
| <b>RF: 500, 1</b>   | -0.0457 | 1.3123 | 0.9274 | 0.1028 |
|                     | -0.0790 | 0.9259 | 0.9211 |        |
|                     | -0.0125 | 1.6988 | 0.9338 |        |
| <b>RF: 500, 5</b>   | -0.0168 | 0.7556 | 0.9734 | 0.0604 |
|                     | -0.0440 | 0.5833 | 0.9711 |        |
|                     | 0.0104  | 0.9280 | 0.9757 |        |
| <b>RF: 500, 10</b>  | -0.0178 | 0.7375 | 0.9737 | 0.0696 |
|                     | -0.0484 | 0.5601 | 0.9714 |        |
|                     | 0.0128  | 0.9149 | 0.9760 |        |

**Supplementary Table H:** *Internal* validation results from models including demographic, ACC variables, and DASH. Criteria is equal to  $(\text{slope}-1)^2 + (\text{C-statistic}-1)^2$ .

|                    | <b>Intercept</b> | <b>Slope</b>  | <b>C-Statistic</b> | <b>Criteria</b> |
|--------------------|------------------|---------------|--------------------|-----------------|
|                    | <b>95% CI</b>    | <b>95% CI</b> | <b>95% CI</b>      |                 |
| <b>Cox</b>         | 0.0009           | 0.5165        | 0.8615             | 0.2530          |
|                    | -0.0027          | 0.4896        | 0.8525             |                 |
|                    | 0.0045           | 0.5434        | 0.8706             |                 |
| <b>GBM: 100, 1</b> | -0.0006          | 0.5456        | 0.8769             | 0.2216          |
|                    | -0.0073          | 0.4949        | 0.8687             |                 |
|                    | 0.0061           | 0.5964        | 0.8851             |                 |

|                     |         |        |        |        |
|---------------------|---------|--------|--------|--------|
| <b>GBM: 100, 5</b>  | -0.0032 | 0.5684 | 0.9018 | 0.1959 |
|                     | -0.0074 | 0.5391 | 0.8940 |        |
|                     | 0.0010  | 0.5977 | 0.9097 |        |
| <b>GBM: 100, 10</b> | -0.0048 | 0.5825 | 0.9183 | 0.1810 |
|                     | -0.0099 | 0.5494 | 0.9108 |        |
|                     | 0.0002  | 0.6157 | 0.9258 |        |
| <b>GBM: 300, 1</b>  | -0.0006 | 0.5553 | 0.8766 | 0.2130 |
|                     | -0.0075 | 0.5052 | 0.8683 |        |
|                     | 0.0063  | 0.6054 | 0.8848 |        |
| <b>GBM: 300, 5</b>  | -0.0022 | 0.5545 | 0.8990 | 0.2087 |
|                     | -0.0064 | 0.5255 | 0.8910 |        |
|                     | 0.0020  | 0.5836 | 0.9069 |        |
| <b>GBM: 300, 10</b> | -0.0041 | 0.5727 | 0.9172 | 0.1894 |
|                     | -0.0105 | 0.5307 | 0.9098 |        |
|                     | 0.0023  | 0.6146 | 0.9245 |        |
| <b>GBM: 500, 1</b>  | -0.0004 | 0.5423 | 0.8772 | 0.2246 |
|                     | -0.0076 | 0.4880 | 0.8690 |        |
|                     | 0.0068  | 0.5965 | 0.8853 |        |
| <b>GBM: 500, 5</b>  | -0.0033 | 0.5719 | 0.9016 | 0.1930 |
|                     | -0.0078 | 0.5403 | 0.8938 |        |
|                     | 0.0013  | 0.6035 | 0.9094 |        |
| <b>GBM: 500, 10</b> | -0.0029 | 0.5674 | 0.9064 | 0.1959 |
|                     | -0.0083 | 0.5306 | 0.8986 |        |
|                     | 0.0025  | 0.6043 | 0.9141 |        |
| <b>RF: 100, 1</b>   | -0.0475 | 1.3431 | 0.9272 | 0.1230 |
|                     | -0.0805 | 0.9557 | 0.9206 |        |
|                     | -0.0145 | 1.7304 | 0.9337 |        |
| <b>RF: 100, 5</b>   | -0.0198 | 0.7633 | 0.9763 | 0.0566 |
|                     | -0.0524 | 0.5706 | 0.9741 |        |
|                     | 0.0128  | 0.9560 | 0.9784 |        |
| <b>RF: 100, 10</b>  | -0.0219 | 0.7462 | 0.9758 | 0.0650 |
|                     | -0.0610 | 0.5376 | 0.9736 |        |
|                     | 0.0172  | 0.9549 | 0.9780 |        |
| <b>RF: 300, 1</b>   | -0.0469 | 1.3320 | 0.9311 | 0.1150 |
|                     | -0.0817 | 0.9285 | 0.9249 |        |
|                     | -0.0121 | 1.7354 | 0.9372 |        |
| <b>RF: 300, 5</b>   | -0.0171 | 0.7578 | 0.9767 | 0.0592 |
|                     | -0.0451 | 0.5818 | 0.9746 |        |
|                     | 0.0108  | 0.9339 | 0.9789 |        |
| <b>RF: 300, 10</b>  | -0.0225 | 0.7558 | 0.9767 | 0.0602 |
|                     | -0.0630 | 0.5384 | 0.9746 |        |
|                     | 0.0179  | 0.9731 | 0.9788 |        |
| <b>RF: 500, 1</b>   | -0.0439 | 1.2784 | 0.9309 | 0.0823 |
|                     | -0.0757 | 0.9184 | 0.9247 |        |
|                     | -0.0121 | 1.6383 | 0.9370 |        |

|                    |         |        |        |        |
|--------------------|---------|--------|--------|--------|
| <b>RF: 500, 5</b>  | -0.0176 | 0.7640 | 0.9766 | 0.0562 |
|                    | -0.0467 | 0.5804 | 0.9745 |        |
|                    | 0.0115  | 0.9476 | 0.9788 |        |
| <b>RF: 500, 10</b> | -0.0184 | 0.7408 | 0.9766 | 0.0677 |
|                    | -0.0506 | 0.5556 | 0.9745 |        |
|                    | 0.0138  | 0.9260 | 0.9787 |        |

**Supplementary Table I:** Internal validation results from models including demographic, ACC variables, and nutrition variables. Criteria is equal to  $(\text{slope}-1)^2 + (\text{C-statistic}-1)^2$ .

|                     | <b>Intercept<br/>95% CI</b>   | <b>Slope<br/>95% CI</b>    | <b>C-Statistic<br/>95% CI</b> | <b>Criteria</b> |
|---------------------|-------------------------------|----------------------------|-------------------------------|-----------------|
| <b>Cox</b>          | 0.0007<br>-0.0016<br>0.0031   | 0.5156<br>0.4991<br>0.5321 | 0.8750<br>0.8661<br>0.8838    | 0.2503          |
| <b>GBM: 100, 1</b>  | -0.0027<br>-0.0075<br>0.0021  | 0.5748<br>0.5386<br>0.6111 | 0.8811<br>0.8729<br>0.8894    | 0.1949          |
| <b>GBM: 100, 5</b>  | -0.0063<br>-0.0121<br>-0.0004 | 0.6183<br>0.5778<br>0.6589 | 0.9169<br>0.9092<br>0.9246    | 0.1526          |
| <b>GBM: 100, 10</b> | -0.0088<br>-0.0203<br>0.0026  | 0.6767<br>0.5990<br>0.7545 | 0.9377<br>0.9309<br>0.9445    | 0.1084          |
| <b>GBM: 300, 1</b>  | -0.0024<br>-0.0071<br>0.0024  | 0.5723<br>0.5354<br>0.6091 | 0.8793<br>0.8707<br>0.8878    | 0.1975          |
| <b>GBM: 300, 5</b>  | -0.0066<br>-0.0140<br>0.0007  | 0.6294<br>0.5778<br>0.6811 | 0.9135<br>0.9059<br>0.9211    | 0.1448          |
| <b>GBM: 300, 10</b> | -0.0061<br>-0.0152<br>0.0029  | 0.6427<br>0.5795<br>0.7060 | 0.9228<br>0.9152<br>0.9303    | 0.1336          |
| <b>GBM: 500, 1</b>  | -0.0020<br>-0.0077<br>0.0036  | 0.5616<br>0.5188<br>0.6044 | 0.8785<br>0.8700<br>0.8870    | 0.2070          |
| <b>GBM: 500, 5</b>  | -0.0073<br>-0.0161<br>0.0016  | 0.6395<br>0.5770<br>0.7020 | 0.9160<br>0.9082<br>0.9239    | 0.1370          |
| <b>GBM: 500, 10</b> | -0.0083<br>-0.0183<br>0.0016  | 0.6644<br>0.5961<br>0.7327 | 0.9314<br>0.9242<br>0.9386    | 0.1173          |



|                    |         |        |        |        |
|--------------------|---------|--------|--------|--------|
| <b>RF: 100, 1</b>  | -0.1754 | 3.3994 | 0.9874 | 5.7573 |
|                    | -0.2884 | 1.7584 | 0.9853 |        |
|                    | -0.0624 | 5.0405 | 0.9895 |        |
| <b>RF: 100, 5</b>  | -0.0427 | 1.2353 | 0.9967 | 0.0554 |
|                    | -0.0884 | 0.8154 | 0.9960 |        |
|                    | 0.0029  | 1.6552 | 0.9973 |        |
| <b>RF: 100, 10</b> | -0.0328 | 1.0458 | 0.9942 | 0.0021 |
|                    | -0.0743 | 0.7056 | 0.9932 |        |
|                    | 0.0087  | 1.3860 | 0.9952 |        |
| <b>RF: 300, 1</b>  | -0.1742 | 3.3849 | 0.9919 | 5.6878 |
|                    | -0.2843 | 1.7938 | 0.9903 |        |
|                    | -0.0642 | 4.9760 | 0.9934 |        |
| <b>RF: 300, 5</b>  | -0.0432 | 1.2387 | 0.9969 | 0.0570 |
|                    | -0.0884 | 0.8230 | 0.9963 |        |
|                    | 0.0021  | 1.6544 | 0.9975 |        |
| <b>RF: 300, 10</b> | -0.0333 | 1.0426 | 0.9943 | 0.0018 |
|                    | -0.0739 | 0.7138 | 0.9934 |        |
|                    | 0.0072  | 1.3713 | 0.9953 |        |
| <b>RF: 500, 1</b>  | -0.1813 | 3.4987 | 0.9921 | 6.2436 |
|                    | -0.2962 | 1.8260 | 0.9907 |        |
|                    | -0.0664 | 5.1713 | 0.9935 |        |
| <b>RF: 500, 5</b>  | -0.0436 | 1.2453 | 0.9970 | 0.0602 |
|                    | -0.0885 | 0.8311 | 0.9964 |        |
|                    | 0.0013  | 1.6596 | 0.9976 |        |
| <b>RF: 500, 10</b> | -0.0337 | 1.0453 | 0.9944 | 0.0021 |
|                    | -0.0743 | 0.7155 | 0.9934 |        |
|                    | 0.0069  | 1.3751 | 0.9953 |        |

**Table J:** External validation results from models including demographic and ACC variables only. Criteria is equal to  $(\text{slope}-1)^2 + (\text{C-statistic}-1)^2$ . Best performing GBM and RF are italicized.

|                    | <b>Intercept</b> | <b>Slope</b>  | <b>C-Statistic</b> | <b>Criteria</b> |
|--------------------|------------------|---------------|--------------------|-----------------|
|                    | <b>95% CI</b>    | <b>95% CI</b> | <b>95% CI</b>      |                 |
| <b>Cox</b>         | -0.0004          | 0.5278        | 0.8780             | 0.2379          |
|                    | -0.0038          | 0.5037        | 0.8667             |                 |
|                    | 0.0029           | 0.5520        | 0.8893             |                 |
| <b>GBM: 100, 1</b> | -0.0004          | 0.5276        | 0.8846             | 0.2365          |
|                    | -0.0096          | 0.4621        | 0.8737             |                 |
|                    | 0.0088           | 0.5931        | 0.8956             |                 |
| <b>GBM: 100, 5</b> | 0.0004           | 0.5294        | 0.8948             | 0.2325          |
|                    | -0.0064          | 0.4828        | 0.8840             |                 |
|                    | 0.0072           | 0.5761        | 0.9056             |                 |

|                     |         |        |        |        |
|---------------------|---------|--------|--------|--------|
| <b>GBM: 100, 10</b> | 0.0020  | 0.5358 | 0.9020 | 0.2251 |
|                     | -0.0050 | 0.4875 | 0.8914 |        |
|                     | 0.0090  | 0.5841 | 0.9126 |        |
| <b>GBM: 300, 1</b>  | 0.0004  | 0.5250 | 0.8838 | 0.2391 |
|                     | -0.0101 | 0.4532 | 0.8728 |        |
|                     | 0.0108  | 0.5968 | 0.8948 |        |
| <b>GBM: 300, 5</b>  | 0.0017  | 0.5254 | 0.8919 | 0.2369 |
|                     | -0.0063 | 0.4696 | 0.8810 |        |
|                     | 0.0097  | 0.5813 | 0.9027 |        |
| <b>GBM: 300, 10</b> | 0.0004  | 0.5342 | 0.9022 | 0.2265 |
|                     | -0.0058 | 0.4932 | 0.8917 |        |
|                     | 0.0065  | 0.5751 | 0.9128 |        |
| <b>GBM: 500, 1</b>  | 0.0005  | 0.5173 | 0.8843 | 0.2464 |
|                     | -0.0102 | 0.4408 | 0.8733 |        |
|                     | 0.0113  | 0.5939 | 0.8952 |        |
| <b>GBM: 500, 5</b>  | 0.0011  | 0.5306 | 0.8944 | 0.2315 |
|                     | -0.0052 | 0.4869 | 0.8837 |        |
|                     | 0.0074  | 0.5743 | 0.9052 |        |
| <b>GBM: 500, 10</b> | 0.0030  | 0.5608 | 0.9010 | 0.2027 |
|                     | -0.0042 | 0.5091 | 0.8905 |        |
|                     | 0.0102  | 0.6124 | 0.9115 |        |
| <b>RF: 100, 1</b>   | -0.0427 | 1.2546 | 0.9097 | 0.0730 |
|                     | -0.0744 | 0.8887 | 0.8982 |        |
|                     | -0.0109 | 1.6204 | 0.9213 |        |
| <b>RF: 100, 5</b>   | -0.0077 | 0.6025 | 0.9273 | 0.1633 |
|                     | -0.0224 | 0.5196 | 0.9167 |        |
|                     | 0.0070  | 0.6853 | 0.9379 |        |
| <b>RF: 100, 10</b>  | -0.0051 | 0.5591 | 0.9260 | 0.1999 |
|                     | -0.0176 | 0.4954 | 0.9157 |        |
|                     | 0.0075  | 0.6228 | 0.9363 |        |
| <b>RF: 300, 1</b>   | -0.0380 | 1.1824 | 0.9083 | 0.0417 |
|                     | -0.0609 | 0.9215 | 0.8969 |        |
|                     | -0.0150 | 1.4433 | 0.9197 |        |
| <b>RF: 300, 5</b>   | -0.0058 | 0.5959 | 0.9281 | 0.1685 |
|                     | -0.0171 | 0.5279 | 0.9180 |        |
|                     | 0.0055  | 0.6639 | 0.9383 |        |
| <b>RF: 300, 10</b>  | -0.0046 | 0.5559 | 0.9269 | 0.2026 |
|                     | -0.0163 | 0.4970 | 0.9167 |        |
|                     | 0.0070  | 0.6149 | 0.9371 |        |
| <b>RF: 500, 1</b>   | -0.0410 | 1.2346 | 0.9079 | 0.0635 |
|                     | -0.0659 | 0.9484 | 0.8963 |        |
|                     | -0.0162 | 1.5207 | 0.9195 |        |
| <b>RF: 500, 5</b>   | -0.0066 | 0.5966 | 0.9281 | 0.1679 |
|                     | -0.0186 | 0.5278 | 0.9182 |        |
|                     | 0.0053  | 0.6654 | 0.9381 |        |

|                    |         |        |        |        |
|--------------------|---------|--------|--------|--------|
| <b>RF: 500, 10</b> | -0.0060 | 0.5671 | 0.9274 | 0.1927 |
|                    | -0.0201 | 0.4952 | 0.9173 |        |
|                    | 0.0080  | 0.6390 | 0.9375 |        |

**Supplementary Table K:** *External validation results from models including demographic, ACC variables, and HEI. Criteria is equal to (slope-1)<sup>2</sup> + (C-statistic-1)<sup>2</sup>. Best performing GBM and RF are italicized.*

|                     | <b>Intercept</b> | <b>Slope</b>  | <b>C-Statistic</b> | <b>Criteria</b> |
|---------------------|------------------|---------------|--------------------|-----------------|
|                     | <b>95% CI</b>    | <b>95% CI</b> | <b>95% CI</b>      |                 |
| <b>Cox</b>          | -0.0003          | 0.5265        | 0.8781             | 0.2391          |
|                     | -0.0040          | 0.5003        | 0.8667             |                 |
|                     | 0.0033           | 0.5527        | 0.8894             |                 |
| <b>GBM: 100, 1</b>  | 0.0005           | 0.5395        | 0.8846             | 0.2254          |
|                     | -0.0110          | 0.4587        | 0.8734             |                 |
|                     | 0.0120           | 0.6204        | 0.8958             |                 |
| <b>GBM: 100, 5</b>  | 0.0012           | 0.5513        | 0.8943             | 0.2125          |
|                     | -0.0071          | 0.4910        | 0.8834             |                 |
|                     | 0.0096           | 0.6116        | 0.9051             |                 |
| <b>GBM: 100, 10</b> | 0.0020           | 0.5908        | 0.8968             | 0.1781          |
|                     | -0.0048          | 0.5397        | 0.8857             |                 |
|                     | 0.0088           | 0.6419        | 0.9080             |                 |
| <b>GBM: 300, 1</b>  | -0.0006          | 0.5416        | 0.8843             | 0.2235          |
|                     | -0.0110          | 0.4644        | 0.8731             |                 |
|                     | 0.0098           | 0.6187        | 0.8955             |                 |
| <b>GBM: 300, 5</b>  | 0.0007           | 0.5469        | 0.8963             | 0.2161          |
|                     | -0.0062          | 0.4975        | 0.8855             |                 |
|                     | 0.0077           | 0.5963        | 0.9070             |                 |
| <b>GBM: 300, 10</b> | 0.0012           | 0.5769        | 0.9035             | 0.1883          |
|                     | -0.0063          | 0.5229        | 0.8929             |                 |
|                     | 0.0087           | 0.6309        | 0.9142             |                 |
| <b>GBM: 500, 1</b>  | -0.0003          | 0.5362        | 0.8843             | 0.2285          |
|                     | -0.0097          | 0.4677        | 0.8733             |                 |
|                     | 0.0091           | 0.6047        | 0.8954             |                 |
| <b>GBM: 500, 5</b>  | 0.0012           | 0.5594        | 0.8969             | 0.2048          |
|                     | -0.0068          | 0.5011        | 0.8858             |                 |
|                     | 0.0092           | 0.6177        | 0.9081             |                 |
| <b>GBM: 500, 10</b> | 0.0009           | 0.5699        | 0.9047             | 0.1941          |
|                     | -0.0037          | 0.5371        | 0.8942             |                 |
|                     | 0.0056           | 0.6026        | 0.9152             |                 |
| <b>RF: 100, 1</b>   | -0.0395          | 1.2045        | 0.9127             | 0.0494          |
|                     | -0.0619          | 0.9521        | 0.9015             |                 |
|                     | -0.0171          | 1.4570        | 0.9239             |                 |

|                    |         |        |        |        |
|--------------------|---------|--------|--------|--------|
| <b>RF: 100, 5</b>  | -0.0076 | 0.6063 | 0.9309 | 0.1598 |
|                    | -0.0212 | 0.5282 | 0.9213 |        |
|                    | 0.0060  | 0.6844 | 0.9406 |        |
| <b>RF: 100, 10</b> | -0.0078 | 0.5851 | 0.9304 | 0.1770 |
|                    | -0.0257 | 0.4934 | 0.9204 |        |
|                    | 0.0101  | 0.6768 | 0.9403 |        |
| <b>RF: 300, 1</b>  | -0.0378 | 1.1752 | 0.9154 | 0.0379 |
|                    | -0.0633 | 0.8938 | 0.9043 |        |
|                    | -0.0124 | 1.4566 | 0.9264 |        |
| <b>RF: 300, 5</b>  | -0.0084 | 0.6177 | 0.9314 | 0.1509 |
|                    | -0.0241 | 0.5266 | 0.9216 |        |
|                    | 0.0074  | 0.7088 | 0.9411 |        |
| <b>RF: 300, 10</b> | -0.0078 | 0.5867 | 0.9309 | 0.1756 |
|                    | -0.0233 | 0.5065 | 0.9212 |        |
|                    | 0.0078  | 0.6669 | 0.9406 |        |
| <b>RF: 500, 1</b>  | -0.0377 | 1.1735 | 0.9148 | 0.0374 |
|                    | -0.0625 | 0.8969 | 0.9038 |        |
|                    | -0.0129 | 1.4501 | 0.9258 |        |
| <b>RF: 500, 5</b>  | -0.0077 | 0.6221 | 0.9318 | 0.1475 |
|                    | -0.0222 | 0.5329 | 0.9222 |        |
|                    | 0.0068  | 0.7112 | 0.9415 |        |
| <b>RF: 500, 10</b> | -0.0066 | 0.5851 | 0.9308 | 0.1769 |
|                    | -0.0209 | 0.5060 | 0.9212 |        |
|                    | 0.0078  | 0.6641 | 0.9403 |        |

**Supplementary Table L:** External validation results from models including demographic, ACC variables, and AHEI. Criteria is equal to  $(\text{slope}-1)^2 + (\text{C-statistic}-1)^2$ . Best performing GBM and RF are italicized.

|                     | <b>Intercept</b> | <b>Slope</b>  | <b>C-Statistic</b> | <b>Criteria</b> |
|---------------------|------------------|---------------|--------------------|-----------------|
|                     | <b>95% CI</b>    | <b>95% CI</b> | <b>95% CI</b>      |                 |
| <b>Cox</b>          | -0.0009          | 0.5347        | 0.8784             | 0.2313          |
|                     | -0.0041          | 0.5115        | 0.8671             |                 |
|                     | 0.0023           | 0.5579        | 0.8897             |                 |
| <b>GBM: 100, 1</b>  | -0.0009          | 0.5326        | 0.8839             | 0.2319          |
|                     | -0.0106          | 0.4627        | 0.8728             |                 |
|                     | 0.0088           | 0.6025        | 0.8951             |                 |
| <b>GBM: 100, 5</b>  | 0.0005           | 0.5312        | 0.8964             | 0.2305          |
|                     | -0.0052          | 0.4924        | 0.8857             |                 |
|                     | 0.0061           | 0.5700        | 0.9071             |                 |
| <b>GBM: 100, 10</b> | 0.0009           | 0.5697        | 0.9025             | 0.1947          |
|                     | -0.0044          | 0.5315        | 0.8917             |                 |
|                     | 0.0063           | 0.6079        | 0.9133             |                 |
| <b>GBM: 300, 1</b>  | 0.0001           | 0.5197        | 0.8852             | 0.2439          |
|                     | -0.0088          | 0.4561        | 0.8741             |                 |

|                     |         |        |        |        |
|---------------------|---------|--------|--------|--------|
|                     | 0.0089  | 0.5833 | 0.8963 |        |
| <b>GBM: 300, 5</b>  | 0.0002  | 0.5223 | 0.8957 | 0.2391 |
|                     | -0.0092 | 0.4583 | 0.8852 |        |
|                     | 0.0097  | 0.5864 | 0.9062 |        |
| <b>GBM: 300, 10</b> | 0.0030  | 0.5638 | 0.9061 | 0.1991 |
|                     | -0.0034 | 0.5179 | 0.8954 |        |
|                     | 0.0095  | 0.6096 | 0.9168 |        |
| <b>GBM: 500, 1</b>  | -0.0004 | 0.5284 | 0.8848 | 0.2357 |
|                     | -0.0097 | 0.4612 | 0.8737 |        |
|                     | 0.0090  | 0.5955 | 0.8960 |        |
| <b>GBM: 500, 5</b>  | 0.0018  | 0.5348 | 0.8942 | 0.2276 |
|                     | -0.0063 | 0.4780 | 0.8836 |        |
|                     | 0.0098  | 0.5916 | 0.9047 |        |
| <b>GBM: 500, 10</b> | 0.0011  | 0.5511 | 0.9054 | 0.2105 |
|                     | -0.0038 | 0.5176 | 0.8948 |        |
|                     | 0.0060  | 0.5846 | 0.9161 |        |
| <b>RF: 100, 1</b>   | -0.0416 | 1.2373 | 0.9141 | 0.0637 |
|                     | -0.0695 | 0.9188 | 0.9028 |        |
|                     | -0.0137 | 1.5558 | 0.9255 |        |
| <b>RF: 100, 5</b>   | -0.0081 | 0.6211 | 0.9296 | 0.1485 |
|                     | -0.0243 | 0.5268 | 0.9196 |        |
|                     | 0.0080  | 0.7154 | 0.9395 |        |
| <b>RF: 100, 10</b>  | -0.0064 | 0.5761 | 0.9288 | 0.1848 |
|                     | -0.0200 | 0.5061 | 0.9191 |        |
|                     | 0.0071  | 0.6460 | 0.9386 |        |
| <b>RF: 300, 1</b>   | -0.0372 | 1.1657 | 0.9147 | 0.0347 |
|                     | -0.0610 | 0.9034 | 0.9036 |        |
|                     | -0.0134 | 1.4281 | 0.9258 |        |
| <b>RF: 300, 5</b>   | -0.0066 | 0.6066 | 0.9309 | 0.1595 |
|                     | -0.0184 | 0.5344 | 0.9212 |        |
|                     | 0.0053  | 0.6788 | 0.9406 |        |
| <b>RF: 300, 10</b>  | -0.0067 | 0.5774 | 0.9299 | 0.1835 |
|                     | -0.0206 | 0.5058 | 0.9201 |        |
|                     | 0.0073  | 0.6491 | 0.9396 |        |
| <b>RF: 500, 1</b>   | -0.0429 | 1.2622 | 0.9137 | 0.0762 |
|                     | -0.0699 | 0.9513 | 0.9024 |        |
|                     | -0.0159 | 1.5731 | 0.9249 |        |
| <b>RF: 500, 5</b>   | -0.0074 | 0.6195 | 0.9307 | 0.1496 |
|                     | -0.0215 | 0.5326 | 0.9208 |        |
|                     | 0.0068  | 0.7063 | 0.9407 |        |
| <b>RF: 500, 10</b>  | -0.0055 | 0.5733 | 0.9295 | 0.1870 |
|                     | -0.0175 | 0.5070 | 0.9196 |        |
|                     | 0.0066  | 0.6396 | 0.9394 |        |

**Supplementary Table M:** *External validation results from models including demographic, ACC variables, and MDS. Criteria is equal to (slope-1)<sup>2</sup> + (C-statistic-1)<sup>2</sup>. Best performing GBM and RF are italicized.*

|                     | <b>Intercept</b> | <b>Slope</b>  | <b>C-Statistic</b> | <b>Criteria</b> |
|---------------------|------------------|---------------|--------------------|-----------------|
|                     | <b>95% CI</b>    | <b>95% CI</b> | <b>95% CI</b>      |                 |
| <b>Cox</b>          | -0.0003          | 0.5268        | 0.8783             | 0.2387          |
|                     | -0.0037          | 0.5020        | 0.8670             |                 |
|                     | 0.0032           | 0.5516        | 0.8896             |                 |
| <b>GBM: 100, 1</b>  | -0.0009          | 0.5401        | 0.8860             | 0.2245          |
|                     | -0.0099          | 0.4738        | 0.8749             |                 |
|                     | 0.0081           | 0.6064        | 0.8972             |                 |
| <b>GBM: 100, 5</b>  | 0.0012           | 0.5358        | 0.8960             | 0.2263          |
|                     | -0.0047          | 0.4945        | 0.8846             |                 |
|                     | 0.0072           | 0.5770        | 0.9075             |                 |
| <b>GBM: 100, 10</b> | <i>0.0015</i>    | <i>0.5480</i> | <i>0.9043</i>      | <i>0.2135</i>   |
|                     | <i>-0.0064</i>   | <i>0.4927</i> | <i>0.8939</i>      |                 |
|                     | <i>0.0094</i>    | <i>0.6034</i> | <i>0.9147</i>      |                 |
| <b>GBM: 300, 1</b>  | -0.0005          | 0.5253        | 0.8853             | 0.2385          |
|                     | -0.0100          | 0.4578        | 0.8743             |                 |
|                     | 0.0090           | 0.5927        | 0.8963             |                 |
| <b>GBM: 300, 5</b>  | 0.0009           | 0.5382        | 0.8930             | 0.2247          |
|                     | -0.0066          | 0.4851        | 0.8823             |                 |
|                     | 0.0084           | 0.5914        | 0.9037             |                 |
| <b>GBM: 300, 10</b> | 0.0024           | 0.5390        | 0.9036             | 0.2218          |
|                     | -0.0053          | 0.4860        | 0.8931             |                 |
|                     | 0.0100           | 0.5919        | 0.9141             |                 |
| <b>GBM: 500, 1</b>  | -0.0003          | 0.5304        | 0.8856             | 0.2336          |
|                     | -0.0110          | 0.4526        | 0.8745             |                 |
|                     | 0.0103           | 0.6083        | 0.8966             |                 |
| <b>GBM: 500, 5</b>  | 0.0011           | 0.5551        | 0.8974             | 0.2085          |
|                     | -0.0067          | 0.4986        | 0.8867             |                 |
|                     | 0.0090           | 0.6116        | 0.9082             |                 |
| <b>GBM: 500, 10</b> | 0.0014           | 0.5220        | 0.9035             | 0.2378          |
|                     | -0.0056          | 0.4750        | 0.8931             |                 |
|                     | 0.0085           | 0.5690        | 0.9139             |                 |
| <b>RF: 100, 1</b>   | <i>-0.0345</i>   | <i>1.1250</i> | <i>0.9055</i>      | <i>0.0246</i>   |
|                     | <i>-0.0557</i>   | <i>0.8905</i> | <i>0.8941</i>      |                 |
|                     | <i>-0.0133</i>   | <i>1.3595</i> | <i>0.9168</i>      |                 |
| <b>RF: 100, 5</b>   | -0.0084          | 0.6085        | 0.9275             | 0.1585          |
|                     | -0.0232          | 0.5282        | 0.9178             |                 |
|                     | 0.0064           | 0.6887        | 0.9371             |                 |
| <b>RF: 100, 10</b>  | -0.0054          | 0.5666        | 0.9249             | 0.1935          |
|                     | -0.0171          | 0.5063        | 0.9148             |                 |
|                     | 0.0062           | 0.6269        | 0.9351             |                 |

|                    |         |        |        |        |
|--------------------|---------|--------|--------|--------|
| <b>RF: 300, 1</b>  | -0.0404 | 1.2231 | 0.9094 | 0.0580 |
|                    | -0.0659 | 0.9316 | 0.8981 |        |
|                    | -0.0150 | 1.5146 | 0.9207 |        |
| <b>RF: 300, 5</b>  | -0.0066 | 0.6099 | 0.9269 | 0.1575 |
|                    | -0.0190 | 0.5332 | 0.9168 |        |
|                    | 0.0058  | 0.6866 | 0.9371 |        |
| <b>RF: 300, 10</b> | -0.0064 | 0.5802 | 0.9254 | 0.1818 |
|                    | -0.0217 | 0.5000 | 0.9154 |        |
|                    | 0.0090  | 0.6605 | 0.9354 |        |
| <b>RF: 500, 1</b>  | -0.0388 | 1.1954 | 0.9094 | 0.0464 |
|                    | -0.0632 | 0.9179 | 0.8983 |        |
|                    | -0.0145 | 1.4728 | 0.9206 |        |
| <b>RF: 500, 5</b>  | -0.0060 | 0.6030 | 0.9275 | 0.1629 |
|                    | -0.0169 | 0.5352 | 0.9177 |        |
|                    | 0.0050  | 0.6708 | 0.9373 |        |
| <b>RF: 500, 10</b> | -0.0052 | 0.5782 | 0.9267 | 0.1833 |
|                    | -0.0171 | 0.5118 | 0.9169 |        |
|                    | 0.0066  | 0.6446 | 0.9364 |        |

**Supplementary Table N:** External validation results from models including demographic, ACC variables, and DASH. Criteria is equal to  $(\text{slope}-1)^2 + (\text{C-statistic}-1)^2$ . Best performing GBM and RF are italicized.

|                     | <b>Intercept</b> | <b>Slope</b>  | <b>C-Statistic</b> | <b>Criteria</b> |
|---------------------|------------------|---------------|--------------------|-----------------|
|                     | <b>95% CI</b>    | <b>95% CI</b> | <b>95% CI</b>      |                 |
| <b>Cox</b>          | -0.0001          | 0.5248        | 0.8775             | 0.2408          |
|                     | -0.0050          | 0.4892        | 0.8662             |                 |
|                     | 0.0048           | 0.5604        | 0.8888             |                 |
| <b>GBM: 100, 1</b>  | -0.0004          | 0.5277        | 0.8847             | 0.2364          |
|                     | -0.0099          | 0.4598        | 0.8735             |                 |
|                     | 0.0091           | 0.5956        | 0.8959             |                 |
| <b>GBM: 100, 5</b>  | 0.0008           | 0.5548        | 0.8959             | 0.2090          |
|                     | -0.0056          | 0.5080        | 0.8851             |                 |
|                     | 0.0073           | 0.6015        | 0.9067             |                 |
| <b>GBM: 100, 10</b> | <i>0.0002</i>    | <i>0.6169</i> | <i>0.9073</i>      | <i>0.1554</i>   |
|                     | <i>-0.0062</i>   | <i>0.5691</i> | <i>0.8970</i>      |                 |
|                     | <i>0.0066</i>    | <i>0.6647</i> | <i>0.9175</i>      |                 |
| <b>GBM: 300, 1</b>  | -0.0003          | 0.5352        | 0.8849             | 0.2293          |
|                     | -0.0109          | 0.4618        | 0.8737             |                 |
|                     | 0.0103           | 0.6085        | 0.8961             |                 |
| <b>GBM: 300, 5</b>  | 0.0010           | 0.5268        | 0.8925             | 0.2355          |
|                     | -0.0059          | 0.4785        | 0.8812             |                 |
|                     | 0.0080           | 0.5750        | 0.9037             |                 |
| <b>GBM: 300, 10</b> | 0.0022           | 0.5366        | 0.9015             | 0.2244          |
|                     | -0.0048          | 0.4889        | 0.8911             |                 |
|                     | 0.0092           | 0.5843        | 0.9120             |                 |

|                     |         |        |        |        |
|---------------------|---------|--------|--------|--------|
| <b>GBM: 500, 1</b>  | -0.0003 | 0.5276 | 0.8853 | 0.2363 |
|                     | -0.0101 | 0.4577 | 0.8742 |        |
|                     | 0.0094  | 0.5974 | 0.8964 |        |
| <b>GBM: 500, 5</b>  | 0.0006  | 0.5344 | 0.8963 | 0.2275 |
|                     | -0.0074 | 0.4796 | 0.8851 |        |
|                     | 0.0085  | 0.5892 | 0.9074 |        |
| <b>GBM: 500, 10</b> | 0.0003  | 0.5544 | 0.8973 | 0.2091 |
|                     | -0.0034 | 0.5286 | 0.8860 |        |
|                     | 0.0039  | 0.5803 | 0.9086 |        |
| <b>RF: 100, 1</b>   | -0.0410 | 1.2346 | 0.9079 | 0.0635 |
|                     | -0.0659 | 0.9484 | 0.8963 |        |
|                     | -0.0162 | 1.5207 | 0.9195 |        |
| <b>RF: 100, 5</b>   | -0.0066 | 0.5966 | 0.9281 | 0.1679 |
|                     | -0.0186 | 0.5278 | 0.9182 |        |
|                     | 0.0053  | 0.6654 | 0.9381 |        |
| <b>RF: 100, 10</b>  | -0.0060 | 0.5671 | 0.9274 | 0.1927 |
|                     | -0.0201 | 0.4952 | 0.9173 |        |
|                     | 0.0080  | 0.6390 | 0.9375 |        |
| <b>RF: 300, 1</b>   | -0.0393 | 1.2049 | 0.9104 | 0.0500 |
|                     | -0.0636 | 0.9279 | 0.8988 |        |
|                     | -0.0149 | 1.4819 | 0.9219 |        |
| <b>RF: 300, 5</b>   | -0.0062 | 0.6025 | 0.9289 | 0.1631 |
|                     | -0.0178 | 0.5313 | 0.9189 |        |
|                     | 0.0054  | 0.6738 | 0.9389 |        |
| <b>RF: 300, 10</b>  | -0.0070 | 0.5789 | 0.9279 | 0.1825 |
|                     | -0.0214 | 0.5044 | 0.9179 |        |
|                     | 0.0074  | 0.6533 | 0.9379 |        |
| <b>RF: 500, 1</b>   | -0.0369 | 1.1604 | 0.9114 | 0.0336 |
|                     | -0.0597 | 0.9083 | 0.9000 |        |
|                     | -0.0142 | 1.4124 | 0.9227 |        |
| <b>RF: 500, 5</b>   | -0.0053 | 0.5905 | 0.9300 | 0.1726 |
|                     | -0.0142 | 0.5364 | 0.9205 |        |
|                     | 0.0035  | 0.6446 | 0.9396 |        |
| <b>RF: 500, 10</b>  | -0.0057 | 0.5756 | 0.9284 | 0.1852 |
|                     | -0.0181 | 0.5073 | 0.9185 |        |
|                     | 0.0067  | 0.6440 | 0.9383 |        |

**Supplementary Table O:** External validation results from models including demographic, ACC variables, and nutrition variables. Criteria is equal to  $(\text{slope}-1)^2 + (\text{C-statistic}-1)^2$ . Best performing GBM and RF are italicized.

|  | <b>Intercept</b> | <b>Slope</b>  | <b>C-Statistic</b> | <b>Criteria</b> |
|--|------------------|---------------|--------------------|-----------------|
|  | <b>95% CI</b>    | <b>95% CI</b> | <b>95% CI</b>      |                 |



|                     |         |        |        |        |
|---------------------|---------|--------|--------|--------|
| <b>Cox</b>          | 0.0010  | 0.4611 | 0.8830 | 0.3041 |
|                     | -0.0034 | 0.4264 | 0.8698 |        |
|                     | 0.0054  | 0.4959 | 0.8962 |        |
| <b>GBM: 100, 1</b>  | -0.0030 | 0.5674 | 0.8896 | 0.1993 |
|                     | -0.0092 | 0.5227 | 0.8784 |        |
|                     | 0.0031  | 0.6120 | 0.9007 |        |
| <b>GBM: 100, 5</b>  | -0.0016 | 0.5621 | 0.9072 | 0.2004 |
|                     | -0.0073 | 0.5227 | 0.8966 |        |
|                     | 0.0041  | 0.6015 | 0.9178 |        |
| <b>GBM: 100, 10</b> | 0.0027  | 0.6518 | 0.9090 | 0.1295 |
|                     | -0.0049 | 0.5906 | 0.8981 |        |
|                     | 0.0103  | 0.7131 | 0.9200 |        |
| <b>GBM: 300, 1</b>  | -0.0026 | 0.5681 | 0.8886 | 0.1989 |
|                     | -0.0103 | 0.5108 | 0.8772 |        |
|                     | 0.0051  | 0.6254 | 0.9000 |        |
| <b>GBM: 300, 5</b>  | -0.0009 | 0.6548 | 0.9022 | 0.1287 |
|                     | -0.0062 | 0.6121 | 0.8902 |        |
|                     | 0.0044  | 0.6975 | 0.9143 |        |
| <b>GBM: 300, 10</b> | 0.0021  | 0.8318 | 0.9058 | 0.0372 |
|                     | -0.0039 | 0.7710 | 0.8947 |        |
|                     | 0.0081  | 0.8927 | 0.9170 |        |
| <b>GBM: 500, 1</b>  | -0.0026 | 0.5545 | 0.8894 | 0.2107 |
|                     | -0.0101 | 0.5000 | 0.8781 |        |
|                     | 0.0050  | 0.6090 | 0.9008 |        |
| <b>GBM: 500, 5</b>  | -0.0029 | 0.5980 | 0.9030 | 0.1710 |
|                     | -0.0060 | 0.5759 | 0.8912 |        |
|                     | 0.0002  | 0.6202 | 0.9148 |        |
| <b>GBM: 500, 10</b> | 0.0003  | 0.7133 | 0.9098 | 0.0903 |
|                     | -0.0057 | 0.6624 | 0.8990 |        |
|                     | 0.0063  | 0.7642 | 0.9206 |        |
| <b>RF: 100, 1</b>   | -0.1254 | 2.5742 | 0.8937 | 2.4894 |
|                     | -0.1941 | 1.5825 | 0.8781 |        |
|                     | -0.0567 | 3.5659 | 0.9093 |        |
| <b>RF: 100, 5</b>   | -0.0299 | 1.0137 | 0.9320 | 0.0048 |
|                     | -0.0567 | 0.7609 | 0.9208 |        |
|                     | -0.0031 | 1.2666 | 0.9433 |        |
| <b>RF: 100, 10</b>  | -0.0201 | 0.8447 | 0.9336 | 0.0285 |
|                     | -0.0412 | 0.6690 | 0.9226 |        |
|                     | 0.0010  | 1.0204 | 0.9445 |        |
| <b>RF: 300, 1</b>   | -0.1293 | 2.6387 | 0.9059 | 2.6942 |
|                     | -0.1973 | 1.6579 | 0.8914 |        |
|                     | -0.0613 | 3.6195 | 0.9203 |        |
| <b>RF: 300, 5</b>   | -0.0314 | 1.0368 | 0.9371 | 0.0053 |
|                     | -0.0583 | 0.7826 | 0.9262 |        |
|                     | -0.0046 | 1.2909 | 0.9481 |        |

|                    |         |        |        |        |
|--------------------|---------|--------|--------|--------|
| <b>RF: 300, 10</b> | -0.0204 | 0.8343 | 0.9367 | 0.0315 |
|                    | -0.0395 | 0.6773 | 0.9263 |        |
|                    | -0.0012 | 0.9913 | 0.9470 |        |
| <b>RF: 500, 1</b>  | -0.1401 | 2.8162 | 0.9129 | 3.3062 |
|                    | -0.2170 | 1.6982 | 0.8993 |        |
|                    | -0.0632 | 3.9342 | 0.9266 |        |
| <b>RF: 500, 5</b>  | -0.0304 | 1.0242 | 0.9348 | 0.0048 |
|                    | -0.0552 | 0.7896 | 0.9238 |        |
|                    | -0.0057 | 1.2588 | 0.9459 |        |
| <b>RF: 500, 10</b> | -0.0215 | 0.8494 | 0.9379 | 0.0265 |
|                    | -0.0419 | 0.6824 | 0.9277 |        |
|                    | -0.0012 | 1.0165 | 0.9481 |        |

**Supplementary Table P:** Hazard ratios (95% CIs) from Cox models developed on training data. See Supplementary Table A for variable definitions.

|                   | Model 1<br>(ACC)  | Model 2<br>(+HEI) | Model 3<br>(+AHEI) | Model 4<br>(+MDS) | Model 5<br>(+DASH) | Model 6<br>(+All) |
|-------------------|-------------------|-------------------|--------------------|-------------------|--------------------|-------------------|
| age               | 1.10 (1.09, 1.10) | 1.10 (1.09, 1.11) | 1.10 (1.09, 1.11)  | 1.10 (1.09, 1.10) | 1.10 (1.09, 1.11)  | 1.10 (1.09, 1.10) |
| sex               | 0.65 (0.57, 0.73) | 0.65 (0.58, 0.74) | 0.65 (0.58, 0.73)  | 0.65 (0.57, 0.73) | 0.65 (0.58, 0.74)  | 0.61 (0.54, 0.70) |
| black             | 1.14 (0.99, 1.32) | 1.14 (0.99, 1.32) | 1.15 (0.99, 1.33)  | 1.14 (0.99, 1.32) | 1.11 (0.97, 1.29)  | 1.10 (0.99, 1.29) |
| hispanic          | 0.69 (0.58, 0.81) | 0.69 (0.58, 0.82) | 0.69 (0.58, 0.82)  | 0.69 (0.58, 0.82) | 0.70 (0.59, 0.83)  | 0.64 (0.58, 0.77) |
| total_cholesterol | 1.00 (1.00, 1.00) | 1.00 (1.00, 1.00) | 1.00 (1.00, 1.00)  | 1.00 (1.00, 1.00) | 1.00 (1.00, 1.00)  | 1.00 (1.00, 1.00) |
| hdl               | 1.00 (1.00, 1.00) | 1.00 (1.00, 1.00) | 1.00 (1.00, 1.00)  | 1.00 (1.00, 1.00) | 1.00 (1.00, 1.01)  | 1.00 (1.00, 1.00) |
| sbp               | 1.00 (1.00, 1.01) | 1.00 (1.00, 1.01) | 1.00 (1.00, 1.01)  | 1.00 (1.00, 1.01) | 1.01 (1.00, 1.01)  | 1.00 (1.00, 1.01) |
| bpmeds            | 1.19 (1.08, 1.30) | 1.19 (1.09, 1.30) | 1.19 (1.09, 1.30)  | 1.19 (1.09, 1.31) | 1.18 (1.07, 1.29)  | 1.21 (1.09, 1.33) |
| dm                | 1.46 (1.29, 1.65) | 1.46 (1.29, 1.65) | 1.45 (1.29, 1.64)  | 1.46 (1.29, 1.65) | 1.45 (1.28, 1.63)  | 1.40 (1.29, 1.59) |
| tob               | 1.91 (1.61, 2.27) | 1.89 (1.59, 2.25) | 1.88 (1.59, 2.23)  | 1.91 (1.61, 2.26) | 1.84 (1.55, 2.18)  | 1.84 (1.59, 2.19) |
| hei               |                   | 1.00 (0.99, 1.01) |                    |                   |                    |                   |
| ahei              |                   |                   | 1.00 (0.99, 1.00)  |                   |                    |                   |
| mdds              |                   |                   |                    | 1.05 (1.00, 1.10) |                    |                   |
| dash              |                   |                   |                    |                   | 0.99 (0.98, 0.99)  |                   |
| milk_g            |                   |                   |                    |                   |                    | 1 (1, 1)          |
| cream_g           |                   |                   |                    |                   |                    | 1 (0.99, 1)       |
| milk_desse        |                   |                   |                    |                   |                    | 1 (1, 1)          |
| rt_g              |                   |                   |                    |                   |                    |                   |
| cheese_g          |                   |                   |                    |                   |                    | 1 (1, 1)          |
| meat_ns_g         |                   |                   |                    |                   |                    | 1 (0.99, 1.01)    |
| beef_g            |                   |                   |                    |                   |                    | 1 (1, 1)          |
| pork_g            |                   |                   |                    |                   |                    | 1 (1, 1)          |
| lamb_g            |                   |                   |                    |                   |                    | 1 (1, 1)          |
| poultry_g         |                   |                   |                    |                   |                    | 1 (1, 1)          |
| organ_meat_g      |                   |                   |                    |                   |                    | 1 (1, 1)          |
| t_g               |                   |                   |                    |                   |                    |                   |
| fish_g            |                   |                   |                    |                   |                    | 1 (0.99, 1)       |
| meat_nonm         |                   |                   |                    |                   |                    | 1 (1, 1)          |
| eat_g             |                   |                   |                    |                   |                    |                   |
| protein_fro       |                   |                   |                    |                   |                    | 1 (1, 1)          |
| zen_g             |                   |                   |                    |                   |                    |                   |
| eggs_g            |                   |                   |                    |                   |                    | 1 (1, 1)          |
| egg_mixture_g     |                   |                   |                    |                   |                    | 1 (1, 1)          |
| e_g               |                   |                   |                    |                   |                    |                   |
| egg_sub_g         |                   |                   |                    |                   |                    | 0.99 (0.99, 1)    |
| legumes_g         |                   |                   |                    |                   |                    | 1 (1, 1)          |
| nuts_g            |                   |                   |                    |                   |                    | 1 (1, 1)          |
| seeds_g           |                   |                   |                    |                   |                    | 1 (0.99, 1.01)    |
| flour_mixture_g   |                   |                   |                    |                   |                    | 0.22 (0, ∞)       |
| bread_yeast_g     |                   |                   |                    |                   |                    | 1 (1, 1)          |
| t_g               |                   |                   |                    |                   |                    |                   |
| bread_quick_g     |                   |                   |                    |                   |                    | 1 (1, 1)          |
| k_g               |                   |                   |                    |                   |                    |                   |
| pastries_g        |                   |                   |                    |                   |                    | 1 (1, 1)          |
| crackers_g        |                   |                   |                    |                   |                    | 1 (1, 1)          |

|                    | Model 1<br>(ACC) | Model 2<br>(+HEI) | Model 3<br>(+AHEI) | Model 4<br>(+MDS) | Model 5<br>(+DASH) | Model 6<br>(+All) |
|--------------------|------------------|-------------------|--------------------|-------------------|--------------------|-------------------|
| pancakes_g         |                  |                   |                    |                   |                    | 1 (1, 1)          |
| pastas_g           |                  |                   |                    |                   |                    | 1 (1, 1)          |
| cereals_g          |                  |                   |                    |                   |                    | 1 (1, 1)          |
| grain_mix_g        |                  |                   |                    |                   |                    | 1 (1, 1)          |
| meat_sub_g         |                  |                   |                    |                   |                    | 0.78 (0, ∞)       |
| citrus_g           |                  |                   |                    |                   |                    | 1 (1, 1)          |
| fruit_dried_g      |                  |                   |                    |                   |                    | 1 (1, 1.01)       |
| fruit_other_g      |                  |                   |                    |                   |                    | 1 (1, 1)          |
| fruit_juice_g      |                  |                   |                    |                   |                    | 1 (1, 1)          |
| fruit_baby_g       |                  |                   |                    |                   |                    | 0.84 (0, ∞)       |
| potatoes_g         |                  |                   |                    |                   |                    | 1 (1, 1)          |
| veg_darkgreen_g    |                  |                   |                    |                   |                    | 1 (1, 1)          |
| veg_deepyellow_g   |                  |                   |                    |                   |                    | 1 (1, 1.01)       |
| tomatoes_g         |                  |                   |                    |                   |                    | 1 (1, 1)          |
| veg_other_g        |                  |                   |                    |                   |                    | 1 (1, 1)          |
| veg_meat_g         |                  |                   |                    |                   |                    | 1 (1, 1)          |
| veg_mixture_g      |                  |                   |                    |                   |                    | 1 (1, 1)          |
| fats_g             |                  |                   |                    |                   |                    | 1 (1, 1.01)       |
| oils_g             |                  |                   |                    |                   |                    | 1 (0.98, 1.01)    |
| salad_dressing_g   |                  |                   |                    |                   |                    | 1 (1, 1.01)       |
| sweets_g           |                  |                   |                    |                   |                    | 1 (1, 1)          |
| bev_nonalcoholic_g |                  |                   |                    |                   |                    | 1 (1, 1)          |
| bev_alcohol_g      |                  |                   |                    |                   |                    | 1 (1, 1)          |
| water_g            |                  |                   |                    |                   |                    | 1 (1, 1)          |
| kcal               |                  |                   |                    |                   |                    | 1 (1, 1)          |
| protein_g          |                  |                   |                    |                   |                    | 1.01 (1, 1.02)    |
| carb_g             |                  |                   |                    |                   |                    | 1 (1, 1.01)       |
| fiber_g            |                  |                   |                    |                   |                    | 0.96 (0.95, 0.97) |
| fat_g              |                  |                   |                    |                   |                    | 0.99 (0.97, 1.01) |
| fat_sat_g          |                  |                   |                    |                   |                    | 1.19 (1.07, 1.32) |
| fat_mono_g         |                  |                   |                    |                   |                    | 0.96 (0.93, 1)    |
| fat_poly_g         |                  |                   |                    |                   |                    | 0.97 (0.94, 0.99) |
| cholesterol_mg     |                  |                   |                    |                   |                    | 1 (1, 1)          |
| vite_mg            |                  |                   |                    |                   |                    | 0.99 (0.98, 1.01) |
| vita_mg            |                  |                   |                    |                   |                    | 1 (1, 1)          |
| betacarotene_mcg   |                  |                   |                    |                   |                    | 1 (1, 1)          |
| vitb1_mg           |                  |                   |                    |                   |                    | 0.92 (0.78, 1.10) |
| vitb2_mg           |                  |                   |                    |                   |                    | 1.02 (0.87, 1.19) |
| niacin_mg          |                  |                   |                    |                   |                    | 0.98 (0.96, 0.99) |
| vitb6_mg           |                  |                   |                    |                   |                    | 1.11 (0.98, 1.25) |
| folate_mcg         |                  |                   |                    |                   |                    | 1 (1, 1)          |
| vitb12_mcg         |                  |                   |                    |                   |                    | 1 (0.99, 1.02)    |
| vitc_mg            |                  |                   |                    |                   |                    | 1 (1, 1)          |
| calcium_mg         |                  |                   |                    |                   |                    | 1 (1, 1)          |
| phosphorus_mg      |                  |                   |                    |                   |                    | 1 (1, 1)          |
| magnesium_mg       |                  |                   |                    |                   |                    | 1 (1, 1)          |
| iron_mg            |                  |                   |                    |                   |                    | 1.01 (1, 1.03)    |
| zinc_mg            |                  |                   |                    |                   |                    | 1.01 (1, 1.01)    |
| copper_mg          |                  |                   |                    |                   |                    | 0.93 (0.84, 1.03) |
| sodium_mg          |                  |                   |                    |                   |                    | 1 (1, 1)          |
| potassium_mg       |                  |                   |                    |                   |                    | 1 (1, 1)          |
| selenium_mcg       |                  |                   |                    |                   |                    | 1 (0.99, 1)       |
| caffeine_mg        |                  |                   |                    |                   |                    | 1 (1, 1)          |

|                    | Model 1<br>(ACC) | Model 2<br>(+HEI) | Model 3<br>(+AHEI) | Model 4<br>(+MDS) | Model 5<br>(+DASH) | Model 6<br>(+All)   |
|--------------------|------------------|-------------------|--------------------|-------------------|--------------------|---------------------|
| theobromin_e_mg    |                  |                   |                    |                   |                    | 1 (1, 1)            |
| alcohol_gm         |                  |                   |                    |                   |                    | 1.01 (1, 1.01)      |
| sfa_40_gm          |                  |                   |                    |                   |                    | 1.31 (0.69, 2.47)   |
| sfa_60_gm          |                  |                   |                    |                   |                    | 0.67 (0.24, 1.81)   |
| sfa_80_gm          |                  |                   |                    |                   |                    | 1.17 (0.53, 2.60)   |
| sfa_100_gm         |                  |                   |                    |                   |                    | 0.67 (0.22, 2.05)   |
| sfa_120_gm         |                  |                   |                    |                   |                    | 0.88 (0.77, 1.01)   |
| sfa_140_gm         |                  |                   |                    |                   |                    | 0.76 (0.57, 1.01)   |
| sfa_160_gm         |                  |                   |                    |                   |                    | 0.85 (0.76, 0.94)   |
| sfa_180_gm         |                  |                   |                    |                   |                    | 0.86 (0.75, 0.98)   |
| mfa_161h_gm        |                  |                   |                    |                   |                    | 0.85 (0.66, 1.09)   |
| mfa_161o_gm        |                  |                   |                    |                   |                    | 1.06 (1.02, 1.10)   |
| mfa_201_gm         |                  |                   |                    |                   |                    | 1.32 (1.03, 1.69)   |
| mfa_221_gm         |                  |                   |                    |                   |                    | 0.34 (0.13, 0.90)   |
| pfa_182_gm         |                  |                   |                    |                   |                    | 1.07 (1.04, 1.11)   |
| pfa_183_gm         |                  |                   |                    |                   |                    | 0.80 (0.68, 0.95)   |
| pfa_184_gm         |                  |                   |                    |                   |                    | 5.67 (0.15, 211.03) |
| pfa_204_gm         |                  |                   |                    |                   |                    | 1.02 (0.29, 3.64)   |
| pfa_205_gm         |                  |                   |                    |                   |                    | 0.99 (0.21, 4.69)   |
| pfa_225_gm         |                  |                   |                    |                   |                    | 0.63 (0.01, 55.24)  |
| pfa_226_gm         |                  |                   |                    |                   |                    | 1.45 (0.40, 5.24)   |
| water_yesterday_gm |                  |                   |                    |                   |                    | 1 (1, 1)            |

**Supplementary Table Q:** Relative influences of variables in best performing GBM models in training set from each modeling approach. See Supplementary Table A for variable definitions.

|                    | Model 1<br>(ACC) | Model 2<br>(+HEI) | Model 3<br>(+AHEI) | Model 4<br>(+MDS) | Model 5<br>(+DASH) | Model 6<br>(+All) |
|--------------------|------------------|-------------------|--------------------|-------------------|--------------------|-------------------|
| age                | 19.89            | 30.33             | 5.59               | 2.93              | 29.70              | 19.25             |
| sex                | 2.26             | 1.81              | 0.28               | 0.50              | 1.43               | 0.17              |
| black              | 2.13             | 0.61              | 0.02               | 0.02              | 0.70               | 0.01              |
| hispanic           | 0.98             | 0.68              | 0.05               | 0.02              | 0.71               | 0.01              |
| total_chol         | 23.61            | 15.16             | 17.43              | 16.56             | 13.43              | 2.14              |
| hdl                | 18.18            | 11.00             | 2.62               | 36.47             | 12.00              | 2.80              |
| sbp                | 24.06            | 20.79             | 23.02              | 41.44             | 19.09              | 2.56              |
| bpmeds             | 3.47             | 3.11              | 3.11               | 0.12              | 3.94               | 0.49              |
| dm                 | 2.08             | 1.53              | 0.12               | 0.05              | 1.64               | 0.27              |
| tob                | 3.32             | 0.68              | 45.83              | 0.26              | 0.81               | 0.02              |
| hei                |                  | 14.30             |                    |                   |                    |                   |
| ahei               |                  |                   | 1.92               |                   |                    |                   |
| mds                |                  |                   |                    | 1.63              |                    |                   |
| dash               |                  |                   |                    |                   | 16.54              |                   |
| iron_mg            |                  |                   |                    |                   |                    | 10.86             |
| legumes_g          |                  |                   |                    |                   |                    | 8.42              |
| sweets_g           |                  |                   |                    |                   |                    | 6.55              |
| pastries_g         |                  |                   |                    |                   |                    | 5.75              |
| pork_g             |                  |                   |                    |                   |                    | 4.33              |
| vita_mg            |                  |                   |                    |                   |                    | 3.86              |
| sfa_80_gm          |                  |                   |                    |                   |                    | 2.99              |
| cholesterol_mg     |                  |                   |                    |                   |                    | 1.95              |
| water_yesterday_gm |                  |                   |                    |                   |                    | 1.22              |
| erday_gm           |                  |                   |                    |                   |                    |                   |
| copper_mg          |                  |                   |                    |                   |                    | 1.00              |

|                 | Model 1<br>(ACC) | Model 2<br>(+HEI) | Model 3<br>(+AHEI) | Model 4<br>(+MDS) | Model 5<br>(+DASH) | Model 6<br>(+All) |
|-----------------|------------------|-------------------|--------------------|-------------------|--------------------|-------------------|
| fats_g          |                  |                   |                    |                   |                    | 0.97              |
| beef_g          |                  |                   |                    |                   |                    | 0.92              |
| vite_mg         |                  |                   |                    |                   |                    | 0.76              |
| bread_quic      |                  |                   |                    |                   |                    | 0.70              |
| k_g             |                  |                   |                    |                   |                    |                   |
| calcium_m       |                  |                   |                    |                   |                    | 0.67              |
| g               |                  |                   |                    |                   |                    |                   |
| mfa_201_g       |                  |                   |                    |                   |                    | 0.66              |
| m               |                  |                   |                    |                   |                    |                   |
| vitb12_mcg      |                  |                   |                    |                   |                    | 0.65              |
| sfa_140_g       |                  |                   |                    |                   |                    | 0.65              |
| m               |                  |                   |                    |                   |                    |                   |
| betacaro_m      |                  |                   |                    |                   |                    | 0.61              |
| cg              |                  |                   |                    |                   |                    |                   |
| mfa_161o_g      |                  |                   |                    |                   |                    | 0.56              |
| gm              |                  |                   |                    |                   |                    |                   |
| carb_g          |                  |                   |                    |                   |                    | 0.54              |
| kcal            |                  |                   |                    |                   |                    | 0.51              |
| mfa_161h_g      |                  |                   |                    |                   |                    | 0.50              |
| gm              |                  |                   |                    |                   |                    |                   |
| caffeine_m      |                  |                   |                    |                   |                    | 0.47              |
| g               |                  |                   |                    |                   |                    |                   |
| veg_other_g     |                  |                   |                    |                   |                    | 0.46              |
| g               |                  |                   |                    |                   |                    |                   |
| selenium_mcg    |                  |                   |                    |                   |                    | 0.45              |
| zinc_mg         |                  |                   |                    |                   |                    | 0.44              |
| vitb1_mg        |                  |                   |                    |                   |                    | 0.43              |
| pfa_183_g       |                  |                   |                    |                   |                    | 0.41              |
| m               |                  |                   |                    |                   |                    |                   |
| sfa_180_g       |                  |                   |                    |                   |                    | 0.39              |
| m               |                  |                   |                    |                   |                    |                   |
| sfa_120_g       |                  |                   |                    |                   |                    | 0.39              |
| m               |                  |                   |                    |                   |                    |                   |
| magnesium_mg    |                  |                   |                    |                   |                    | 0.38              |
| alcohol_gm      |                  |                   |                    |                   |                    | 0.38              |
| nuts_g          |                  |                   |                    |                   |                    | 0.38              |
| vitc_mg         |                  |                   |                    |                   |                    | 0.37              |
| fiber_g         |                  |                   |                    |                   |                    | 0.37              |
| phosphoru_s_mg  |                  |                   |                    |                   |                    | 0.37              |
| fat_poly_g      |                  |                   |                    |                   |                    | 0.35              |
| potassium_mg    |                  |                   |                    |                   |                    | 0.35              |
| salad_dres      |                  |                   |                    |                   |                    | 0.34              |
| sing_g          |                  |                   |                    |                   |                    |                   |
| vitb6_mg        |                  |                   |                    |                   |                    | 0.34              |
| fat_g           |                  |                   |                    |                   |                    | 0.33              |
| bev_nonalc      |                  |                   |                    |                   |                    | 0.33              |
| ohol_g          |                  |                   |                    |                   |                    |                   |
| fruit_other_g   |                  |                   |                    |                   |                    | 0.32              |
| g               |                  |                   |                    |                   |                    |                   |
| sodium_mg       |                  |                   |                    |                   |                    | 0.32              |
| pancakes_g      |                  |                   |                    |                   |                    | 0.31              |
| g               |                  |                   |                    |                   |                    |                   |
| protein_g       |                  |                   |                    |                   |                    | 0.30              |
| pfa_205_g       |                  |                   |                    |                   |                    | 0.30              |
| m               |                  |                   |                    |                   |                    |                   |
| poultry_g       |                  |                   |                    |                   |                    | 0.29              |
| sfa_160_g       |                  |                   |                    |                   |                    | 0.29              |
| m               |                  |                   |                    |                   |                    |                   |
| pfa_182_g       |                  |                   |                    |                   |                    | 0.28              |
| m               |                  |                   |                    |                   |                    |                   |
| milk_g          |                  |                   |                    |                   |                    | 0.28              |
| folate_mcg      |                  |                   |                    |                   |                    | 0.28              |
| fat_mono_g      |                  |                   |                    |                   |                    | 0.28              |
| g               |                  |                   |                    |                   |                    |                   |
| cheese_g        |                  |                   |                    |                   |                    | 0.26              |
| milk_desse      |                  |                   |                    |                   |                    | 0.26              |
| rt_g            |                  |                   |                    |                   |                    |                   |
| pfa_204_g       |                  |                   |                    |                   |                    | 0.26              |
| m               |                  |                   |                    |                   |                    |                   |
| niacin_mg       |                  |                   |                    |                   |                    | 0.24              |
| theobromin_e_mg |                  |                   |                    |                   |                    | 0.21              |
| pastas_g        |                  |                   |                    |                   |                    | 0.20              |

|                  | Model 1<br>(ACC) | Model 2<br>(+HEI) | Model 3<br>(+AHEI) | Model 4<br>(+MDS) | Model 5<br>(+DASH) | Model 6<br>(+All) |
|------------------|------------------|-------------------|--------------------|-------------------|--------------------|-------------------|
| pfa_226_g        |                  |                   |                    |                   |                    | 0.20              |
| m                |                  |                   |                    |                   |                    |                   |
| veg_darkgr       |                  |                   |                    |                   |                    | 0.19              |
| een_g            |                  |                   |                    |                   |                    |                   |
| bev_alcohol_g    |                  |                   |                    |                   |                    | 0.19              |
| tomatoes_g       |                  |                   |                    |                   |                    | 0.18              |
| fat_sat_g        |                  |                   |                    |                   |                    | 0.16              |
| crackers_g       |                  |                   |                    |                   |                    | 0.16              |
| vitb2_mg         |                  |                   |                    |                   |                    | 0.16              |
| sfa_100_g        |                  |                   |                    |                   |                    | 0.15              |
| m                |                  |                   |                    |                   |                    |                   |
| sfa_60_gm        |                  |                   |                    |                   |                    | 0.14              |
| pfa_225_g        |                  |                   |                    |                   |                    | 0.14              |
| m                |                  |                   |                    |                   |                    |                   |
| mfa_221_g        |                  |                   |                    |                   |                    | 0.14              |
| m                |                  |                   |                    |                   |                    |                   |
| egg_mixture_g    |                  |                   |                    |                   |                    | 0.14              |
| fruit_juice_g    |                  |                   |                    |                   |                    | 0.14              |
| citrus_g         |                  |                   |                    |                   |                    | 0.12              |
| veg_deepy        |                  |                   |                    |                   |                    | 0.12              |
| ellow_g          |                  |                   |                    |                   |                    |                   |
| cream_g          |                  |                   |                    |                   |                    | 0.12              |
| organ_meat_g     |                  |                   |                    |                   |                    | 0.11              |
| potatoes_g       |                  |                   |                    |                   |                    | 0.11              |
| cereals_g        |                  |                   |                    |                   |                    | 0.10              |
| meat_nonm        |                  |                   |                    |                   |                    | 0.09              |
| eat_g            |                  |                   |                    |                   |                    |                   |
| seeds_g          |                  |                   |                    |                   |                    | 0.08              |
| water_g          |                  |                   |                    |                   |                    | 0.06              |
| fish_g           |                  |                   |                    |                   |                    | 0.06              |
| grain_mixture_g  |                  |                   |                    |                   |                    | 0.05              |
| lamb_g           |                  |                   |                    |                   |                    | 0.05              |
| pfa_184_g        |                  |                   |                    |                   |                    | 0.04              |
| m                |                  |                   |                    |                   |                    |                   |
| meat_ns_g        |                  |                   |                    |                   |                    | 0.03              |
| eggs_g           |                  |                   |                    |                   |                    | 0.03              |
| protein_frozen_g |                  |                   |                    |                   |                    | 0.02              |
| oils_g           |                  |                   |                    |                   |                    | 0.02              |
| fruit_dried_g    |                  |                   |                    |                   |                    | 0.02              |
| egg_sub_g        |                  |                   |                    |                   |                    | 0.01              |
| flour_mixture_g  |                  |                   |                    |                   |                    | 0.00              |
| meat_sub_g       |                  |                   |                    |                   |                    | 0.00              |
| fruit_baby_g     |                  |                   |                    |                   |                    | 0.00              |
| veg_meat_g       |                  |                   |                    |                   |                    | 0.00              |
| veg_mixture_g    |                  |                   |                    |                   |                    | 0.00              |
