# Supplementary material
Source: HighWire-hosted journal article supplement (https://bmjopen.bmj.com/content/9/11/e032703)

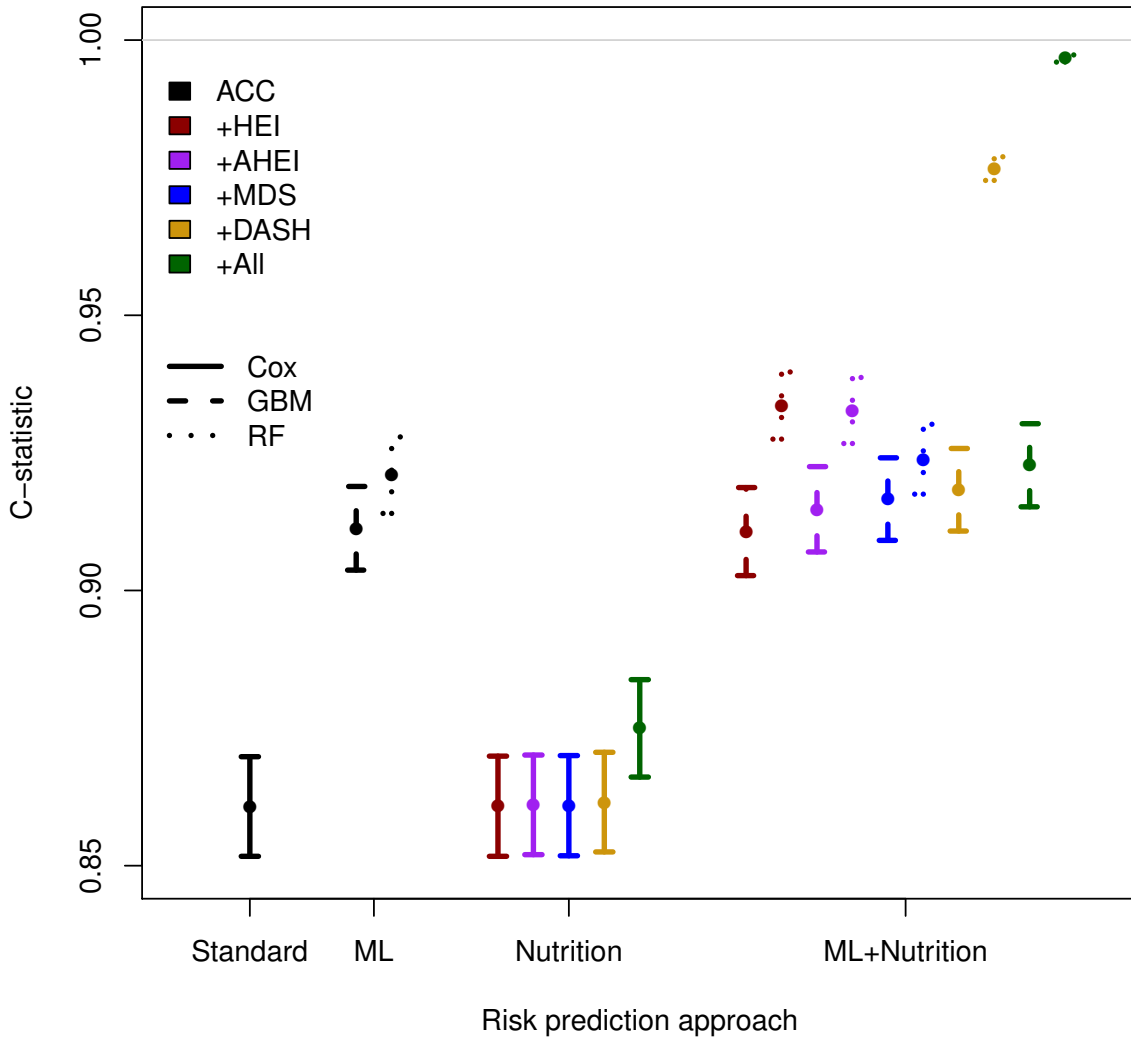

Supplement: inline-supplementary-material-3 [file inline-supplementary-material-3.pdf]
