# Supplementary material
Source: HighWire-hosted journal article supplement (https://bmjopen.bmj.com/content/9/11/e032703)
Supplement: inline-supplementary-material-4 [file inline-supplementary-material-4.pdf]

10-year probability of CVD death

0.00 0.10 0.20

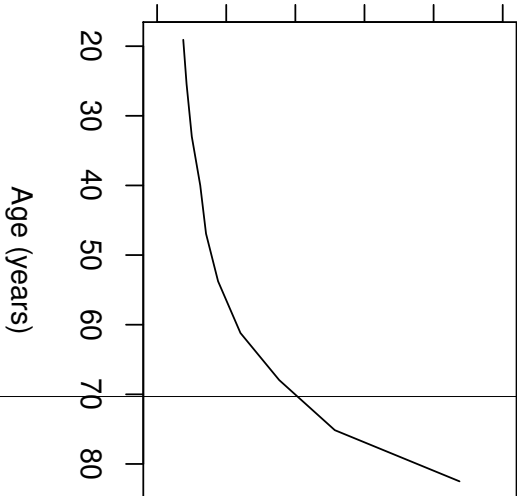

(a)

Supplementary material

BMJ Open

10-year probability of CVD death

0.00 0.10 0.20

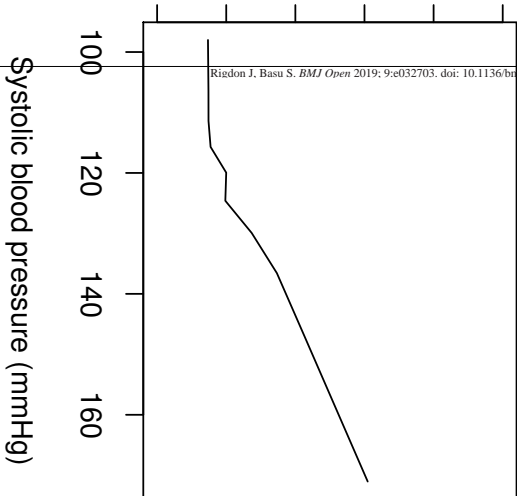

(b)

Rigdon J, Basu S. *BMJ Open* 2019; 9:e032703. doi: 10.1136/bmjopen-2019-032703
